# Supplementary material
Source: PubMed Central journal article supplement (PMC10787044)
Supplement: NIHMS1915123-supplement-Appendix_S1.pdf [file NIHMS1915123-supplement-Appendix_S1.pdf]

Supplementary Appendix S1.

Search Strategies

|                |                                                                                                                                                                                                                                                                                                                                                                                                                                                                                                                                                                                                                                                                                                                                                                                                                                                                                                                                                                                                                                                                                                                                                                                                                                                                                                                                                                                                                                                                                                                                                                                                                                                                                                                                                                                                                                                                                                                                                                                                                                                                                                                                                                                     |     |
|----------------|-------------------------------------------------------------------------------------------------------------------------------------------------------------------------------------------------------------------------------------------------------------------------------------------------------------------------------------------------------------------------------------------------------------------------------------------------------------------------------------------------------------------------------------------------------------------------------------------------------------------------------------------------------------------------------------------------------------------------------------------------------------------------------------------------------------------------------------------------------------------------------------------------------------------------------------------------------------------------------------------------------------------------------------------------------------------------------------------------------------------------------------------------------------------------------------------------------------------------------------------------------------------------------------------------------------------------------------------------------------------------------------------------------------------------------------------------------------------------------------------------------------------------------------------------------------------------------------------------------------------------------------------------------------------------------------------------------------------------------------------------------------------------------------------------------------------------------------------------------------------------------------------------------------------------------------------------------------------------------------------------------------------------------------------------------------------------------------------------------------------------------------------------------------------------------------|-----|
| PubMed         | ((((("neurocognitive disorders" [mesh] OR "dementia" [mesh] OR "cognition disorders" [mesh] OR "memory disorders" [mesh] OR "memory disorder" [tiab] OR "memory disorders" [tiab] OR Dementia [tiab] OR Dementias [tiab] OR Alzheimer [tiab] OR Alzheimer's [tiab] OR "Lewy body" [tiab] OR "cognition disorder" [tiab] OR "cognition disorders" [tiab] OR "cognitive disorder" [tiab] OR "cognitive disorders" [tiab] OR "cognitive impairment" [tiab] OR "cognitive impairments" [tiab] OR "cognitive dysfunction" [tiab] OR "cognitive defect" [tiab] OR "cognitive defects" [tiab] OR "cognitive deficit" [tiab] OR "cognitive deficits" [tiab] OR "neurocognitive disorder" [tiab] OR "neurocognitive disorders" [tiab]) AND ("Advance Care Planning" [mesh] OR "advance care planning" [tiab] OR "advance healthcare planning" [tiab] OR "advance health care planning" [tiab] OR "advance medical planning" [tiab] OR "care planning" [tiab] OR "Advance Directives" [mesh] OR "Advance Directive" [tiab] OR "Advance Directives" [tiab] OR "advance care directive" [tiab] OR "advance care directives" [tiab] OR "advance medical directive" [tiab] OR "advance medical directives" [tiab] OR "healthcare directive" [tiab] OR "healthcare directives" [tiab] OR "health care directive" [tiab] OR "health care directives" [tiab] OR "Living Wills" [mesh] OR "living will" [tiab] OR "living wills" [tiab] OR "power of attorney" [tiab] OR "attorney-in-fact" [tiab] OR Proxy [mesh] OR "healthcare proxy" [tiab] OR "healthcare proxies" [tiab] OR "health care proxy" [tiab] OR "health care proxies" [tiab] OR "legal proxy" [tiab] OR "legal proxies" [tiab] OR "patient agent" [tiab] OR "proxy decision making" [tiab] OR "Decision Making, Shared" [mesh] OR "shared decision making" [tiab] OR "Physician Orders for Life-Sustaining Treatment" [tiab])) AND ("Randomized Controlled Trials as Topic"[mesh] OR "Randomized Controlled Trial" [pt] OR RCT OR "randomized controlled trials" OR "randomized clinical trials" OR "randomized clinical trial" OR "randomized controlled trial")) AND (2011:2021 [dp])) AND (English [la])                           | 94  |
| Embase         | ('cognitive defect'/exp OR 'cognitive defect' OR 'dementia'/exp OR 'dementia' OR 'mild cognitive impairment'/exp OR 'mild cognitive impairment' OR 'cognitive deficit':ab,ti OR 'cognitive deficits':ab,ti OR 'cognitive impairment':ab,ti OR 'cognitive impairments':ab,ti OR 'cognitive dysfunction':ab,ti OR 'cognitive disorder':ab,ti OR 'cognitive disorders':ab,ti OR 'cognition disorder':ab,ti OR 'cognition disorders':ab,ti OR 'alzheimer*':ab,ti OR 'lewy body':ab,ti OR 'memory disorder'/exp OR 'memory disorder' OR 'neurocognitive disorder':ab,ti OR 'neurocognitive disorders':ab,ti) AND ('advance care planning'/exp OR 'advance care planning' OR 'advance healthcare planning':ab,ti OR 'advance health care planning':ab,ti OR 'advance medical planning':ab,ti OR 'care planning':ab,ti OR 'advance directive':ab,ti OR 'advance directives':ab,ti OR 'advance care directive':ab,ti OR 'advance care directives':ab,ti OR 'advance medical directive':ab,ti OR 'advance medical directives':ab,ti OR 'healthcare directive':ab,ti OR 'healthcare directives':ab,ti OR 'health care directive':ab,ti OR 'health care directives':ab,ti OR 'living will'/exp OR 'living will' OR 'power of attorney'/exp OR 'power of attorney' OR 'attorney-in-fact':ab,ti OR 'proxy'/exp OR 'proxy' OR 'healthcare proxy':ab,ti OR 'healthcare proxies':ab,ti OR 'health care proxy':ab,ti OR 'health care proxies':ab,ti OR 'legal proxy':ab,ti OR 'legal proxies':ab,ti OR 'patient agent':ab,ti OR 'proxy decision making':ab,ti OR 'shared decision making'/exp OR 'shared decision making' OR 'physician orders for life sustaining treatment':ab,ti) AND ('randomized controlled trial'/exp OR 'randomized controlled trial' OR rct OR 'randomized controlled trials'/exp OR 'randomized controlled trials' OR 'randomized clinical trials' OR 'randomized clinical trial') NOT ('systematic review'/exp OR 'systematic review' OR 'practice guidelines'/exp OR 'practice guidelines' OR 'feasibility'/exp OR 'feasibility' OR 'clinical protocol'/exp OR 'clinical protocol' OR 'secondary analysis'/exp OR 'secondary analysis') AND [2011-2021]/py AND English:la | 193 |
| Web Of Science | TS=("Neurocognitive Disorders" OR "Neurocognitive Disorder" OR Dementia OR Dementias OR "cognition disorder" OR "cognition disorders" OR "cognitive deficit" OR "cognitive deficits" OR "cognitive disorder" OR "cognitive disorders" OR "memory disorder" OR "memory Disorders" OR Alzheimer OR Alzheimer's OR "Lewy body" OR "cognitive impairment" OR "cognitive impairments" OR "cognitive dysfunction" OR "cognitive defect" OR "cognitive defects") AND TS=("advance care planning" OR "advance healthcare planning" OR "advance health care planning" OR "advance medical planning" OR "care planning" OR "advance directive" OR "advance directives" OR "advance care directive" OR "advance care directives" OR "advance medical directive" OR "advance medical directives" OR "healthcare directive" OR "healthcare directives" OR "health care directive" OR "health care directives" OR "living will" OR "living wills" OR "power of attorney" OR "attorney-in-fact" OR                                                                                                                                                                                                                                                                                                                                                                                                                                                                                                                                                                                                                                                                                                                                                                                                                                                                                                                                                                                                                                                                                                                                                                                                 | 166 |

|           |                                                                                                                                                                                                                                                                                                                                                                                                                                                                                                                                                                                                                                                                                                                                                                                                                                                                                                                                                                                                                                                                                                                                                                                                                                                                                                                                                                                                                                                                                                                                                                                                                                                                                                                                                                                                                                                                                                                                                                                                                                                                                                                                                                                                                                                                                                                                                                                                                                                                                                                                                                                                                                                                                                                                                                                                                                                                                                                                                                |    |
|-----------|----------------------------------------------------------------------------------------------------------------------------------------------------------------------------------------------------------------------------------------------------------------------------------------------------------------------------------------------------------------------------------------------------------------------------------------------------------------------------------------------------------------------------------------------------------------------------------------------------------------------------------------------------------------------------------------------------------------------------------------------------------------------------------------------------------------------------------------------------------------------------------------------------------------------------------------------------------------------------------------------------------------------------------------------------------------------------------------------------------------------------------------------------------------------------------------------------------------------------------------------------------------------------------------------------------------------------------------------------------------------------------------------------------------------------------------------------------------------------------------------------------------------------------------------------------------------------------------------------------------------------------------------------------------------------------------------------------------------------------------------------------------------------------------------------------------------------------------------------------------------------------------------------------------------------------------------------------------------------------------------------------------------------------------------------------------------------------------------------------------------------------------------------------------------------------------------------------------------------------------------------------------------------------------------------------------------------------------------------------------------------------------------------------------------------------------------------------------------------------------------------------------------------------------------------------------------------------------------------------------------------------------------------------------------------------------------------------------------------------------------------------------------------------------------------------------------------------------------------------------------------------------------------------------------------------------------------------------|----|
|           | proxy OR "healthcare proxy" OR "health care proxy" OR "healthcare proxies" OR "health care proxies" OR "legal proxies" OR "legal proxy" OR "patient agent" OR "proxy decision making" OR "Shared Decision Making" OR "Physician Orders for Life-Sustaining Treatment") AND TS=("Randomized Controlled Trial" OR RCT OR "randomized controlled trials" OR "randomized clinical trials" OR "randomized clinical trial") AND DOP=2011-2021 AND LA=English                                                                                                                                                                                                                                                                                                                                                                                                                                                                                                                                                                                                                                                                                                                                                                                                                                                                                                                                                                                                                                                                                                                                                                                                                                                                                                                                                                                                                                                                                                                                                                                                                                                                                                                                                                                                                                                                                                                                                                                                                                                                                                                                                                                                                                                                                                                                                                                                                                                                                                         |    |
| PSYCHINFO | (DE "Neurocognitive Disorders" OR DE "Cognitive Impairment" OR DE "Dementia" OR DE "Alzheimer's disease" OR TI ("cognitive defect" OR "cognitive defects" OR "cognitive impairment" OR "cognitive impairments" OR "cognitive dysfunction" OR "cognitive disorder" OR "cognitive disorders" OR "cognitive deficit" OR "cognitive deficit" OR "cognitive deficits" OR Alzheimer OR Alzheimer's OR dementia OR dementias OR "Lewy body" OR "memory disorder" OR "memory disorders" OR "neurocognitive disorder" OR "neurocognitive disorders") OR AB ("cognitive defect" OR "cognitive defects" OR "cognitive impairment" OR "cognitive impairments" OR "cognitive dysfunction" OR "cognitive disorder" OR "cognitive disorders" OR "cognitive deficit" OR "cognitive deficit" OR "cognitive deficits" OR Alzheimer OR Alzheimer's OR dementia OR dementias OR "Lewy body" OR "memory disorder" OR "memory disorders" OR "neurocognitive disorder" OR "neurocognitive disorders")) AND (DE "Advance Directives" OR TI ("advance care planning" OR "advance healthcare planning" OR "advance health care planning" OR "advance medical planning" OR "care planning" OR "advance directive" OR "advance directives" OR "advance care directive" OR "advance care directives" OR "advance medical directive" OR "advance medical directives" OR "healthcare directive" OR "healthcare directives" OR "health care directive" OR "health care directives" OR "living will" OR "living wills" OR "durable power of attorney" OR "power of attorney" OR "attorney-in-fact" OR proxy OR "healthcare proxy" OR "healthcare proxies" OR "health care proxy" OR "health care proxies" OR "legal proxy" OR "legal proxies" OR "patient agent" OR "proxy decision making" OR "Shared Decision Making" OR "Physician Orders for Life-Sustaining Treatment") OR AB ("advance care planning" OR "advance healthcare planning" OR "advance health care planning" OR "advance medical planning" OR "care planning" OR "advance directive" OR "advance directives" OR "advance care directive" OR "advance care directives" OR "advance medical directive" OR "advance medical directives" OR "healthcare directive" OR "healthcare directives" OR "health care directive" OR "health care directives" OR "living will" OR "living wills" OR "durable power of attorney" OR "power of attorney" OR "attorney-in-fact" OR proxy OR "healthcare proxy" OR "healthcare proxies" OR "health care proxy" OR "health care proxies" OR "legal proxy" OR "legal proxies" OR "patient agent" OR "proxy decision making" OR "Shared Decision Making" OR "Physician Orders for Life-Sustaining Treatment")) AND ("Randomized Controlled Trial" OR RCT OR "randomized controlled trials" OR "randomized clinical trials" OR "randomized clinical trial") AND PY 2011-2021 AND LA English                                                                                                        | 42 |
| CINAHL    | ((MH "dementia+" OR MH "cognition disorders+" OR MH "memory disorders" OR TI ("cognitive defect" OR "cognitive defects" OR "cognitive impairment" OR "cognitive impairments" OR "cognitive dysfunction" OR "cognitive disorder" OR "cognitive disorders" OR "cognition Disorder" OR "cognition disorders" OR "cognitive deficit" OR "cognitive deficits" OR Alzheimer OR Alzheimer's OR dementia OR dementias OR "Lewy body" OR "memory disorder" OR "memory disorders" OR "neurocognitive disorder" OR "neurocognitive disorders") OR AB ("cognitive defect" OR "cognitive defects" OR "cognitive impairment" OR "cognitive impairments" OR "cognitive dysfunction" OR "cognitive disorder" OR "cognitive disorders" OR "cognition disorder" OR "cognition disorders" OR "cognitive deficit" OR "cognitive deficits" OR Alzheimer OR Alzheimer's OR dementia OR dementias OR "Lewy body" OR "memory disorder" OR "memory disorders" OR "neurocognitive disorder" OR "neurocognitive disorders")) AND (MH "advance directives" OR MH "living wills" OR MH "durable power of attorney" OR MH "advance care planning" OR TI ("advance care planning" OR "advance healthcare planning" OR "advance health care planning" OR "advance medical planning" OR "care planning" OR "advance directive" OR "advance directives" OR "advance care directive" OR "advance care directives" OR "advance medical directive" OR "advance medical directives" OR "healthcare directive" OR "healthcare directives" OR "health care directive" OR "health care directives" OR "living will" OR "living wills" OR "durable power of attorney" OR "power of attorney" OR "attorney-in-fact" OR proxy OR "healthcare proxy" OR "healthcare proxies" OR "health care proxy" OR "health care proxies" OR "legal proxy" OR "legal proxies" OR "patient agent" OR "proxy decision making" OR "Shared Decision Making" OR "Physician Orders for Life-Sustaining Treatment") OR AB ("advance care planning" OR "advance healthcare planning" OR "advance health care planning" OR "advance medical planning" OR "care planning" OR "advance directive" OR "advance directives" OR "advance care directive" OR "advance care directives" OR "advance medical directive" OR "advance medical directives" OR "healthcare directive" OR "healthcare directives" OR "health care directive" OR "health care directives" OR "living will" OR "living wills" OR "durable power of attorney" OR "power of attorney" OR "attorney-in-fact" OR proxy OR "healthcare proxy" OR "healthcare proxies" OR "health care proxy" OR "health care proxies" OR "legal proxy" OR "legal proxies" OR "patient agent" OR "proxy decision making" OR "Shared Decision Making" OR "Physician Orders for Life-Sustaining Treatment")) AND ("Randomized Controlled Trial" OR RCT OR "randomized controlled trials" OR "randomized clinical trials" OR "randomized clinical trial") AND PY 2011-2021 AND LA English | 99 |

|  |                                                                                                                                                                                                                                                                                                                                                                                       |  |
|--|---------------------------------------------------------------------------------------------------------------------------------------------------------------------------------------------------------------------------------------------------------------------------------------------------------------------------------------------------------------------------------------|--|
|  | care proxy" OR "health care proxies" OR "legal proxy" OR "legal proxies" OR "patient agent" OR "proxy decision making" OR "Shared Decision Making" OR "Physician Orders for Life-Sustaining Treatment")) AND ("Randomized Controlled Trial" OR RCT OR "randomized controlled trials" OR "randomized clinical trials" OR "randomized clinical trial") AND PY 2011-2021 AND LA English) |  |
|--|---------------------------------------------------------------------------------------------------------------------------------------------------------------------------------------------------------------------------------------------------------------------------------------------------------------------------------------------------------------------------------------|--|

## Summary of Pragmatic Characteristics for Outcome Measures

| Summary of Pragmatic Characteristics for Outcome Measures |                                                                                                                                                                                                                                                                 |                                                                                                                                                                           |                                                                                                                                                                                               |
|-----------------------------------------------------------|-----------------------------------------------------------------------------------------------------------------------------------------------------------------------------------------------------------------------------------------------------------------|---------------------------------------------------------------------------------------------------------------------------------------------------------------------------|-----------------------------------------------------------------------------------------------------------------------------------------------------------------------------------------------|
| Pragmatic Characteristics                                 | Scoring                                                                                                                                                                                                                                                         |                                                                                                                                                                           |                                                                                                                                                                                               |
|                                                           | High                                                                                                                                                                                                                                                            | Moderate                                                                                                                                                                  | Low                                                                                                                                                                                           |
| Acceptable                                                | Good-Excellent                                                                                                                                                                                                                                                  | Minimal-Adequate                                                                                                                                                          | Poor                                                                                                                                                                                          |
| Offers Relative Advantage Over Existing Methods           | Good-Excellent                                                                                                                                                                                                                                                  | Minimal-Adequate                                                                                                                                                          | Poor                                                                                                                                                                                          |
| Completed with Ease                                       | Good-Excellent                                                                                                                                                                                                                                                  | Minimal-Adequate                                                                                                                                                          | Poor                                                                                                                                                                                          |
| Appropriate                                               | Good-Excellent                                                                                                                                                                                                                                                  | Minimal-Adequate                                                                                                                                                          | Poor                                                                                                                                                                                          |
| Fits Organizational Activities                            | Good-Excellent                                                                                                                                                                                                                                                  | Minimal-Adequate                                                                                                                                                          | Poor                                                                                                                                                                                          |
| Informs Clinical or Organizational Decision-Making        | Good-Excellent                                                                                                                                                                                                                                                  | Minimal-Adequate                                                                                                                                                          | Poor                                                                                                                                                                                          |
| Cost                                                      | Measure is either Free or <\$1 per use                                                                                                                                                                                                                          | Measure cost less than \$100 but > \$1                                                                                                                                    | Poor: The measure is extremely costly > \$100 per use                                                                                                                                         |
| Uses Accessible Language                                  | Readability is 12 <sup>th</sup> grade level or less                                                                                                                                                                                                             | Readability is between Graduate/College Level                                                                                                                             | Poor: The measure uses language that was only readable by experts in its content                                                                                                              |
| Assessor Burden (Training)                                | Good/excellent: The measure includes a manual in order to self-train for administration and the cost for the manual is free or minimal                                                                                                                          | Min-Adequate: The measure requires a train-the-administrator component that is specialized or includes a significant cost                                                 | Poor: The measure requires an external, expert administrator, with no option to self-train or for a train-the-administrator component                                                         |
| Assessor Burden (Interpretation)                          | Good-Excellent: The measure includes a range of scores with value labels and cut-off scores, but scoring requires manual calculation and/or additional inspection of response patterns or subscales, and no instructions for handling missing data are provided | Min-Adequate: The measure includes a range of scores with few suggestions for interpreting them but no clear cut-off scores and no instructions for handling missing data | Poor: The measure requires an expert to score and interpret, though no entity to whom to send the measure is identified, and no information on handling missing data is provided              |
| Length                                                    | Good-excellent: Fewer than 50 items                                                                                                                                                                                                                             | Min-Adequate: Fewer than 100 items but > 50.                                                                                                                              | Poor: Greater than 100 items                                                                                                                                                                  |
| Completion time                                           | <10 minutes                                                                                                                                                                                                                                                     | 30 minutes or less but >10 minutes                                                                                                                                        | >30 minutes to complete                                                                                                                                                                       |
| Data Extraction Burden                                    | Low Extraction Burden:<br>Requires small amount of effort to score and easy to interpret scores.<br>Either is already commonly embedded in the EHR or could be easily embedded.                                                                                 | Moderate Extraction Burden:<br>Requires moderate effort to score and interpret.<br>May be challenging to embed and extract from the electronic record.                    | High Extraction Burden<br>Requires high amount of effort to score and interpret, not commonly embedded into clinical practice<br>Would be very challenging to embed and extract from the EHR. |

|                                                                    |                                                                                                    |                                                                          |                                                                        |
|--------------------------------------------------------------------|----------------------------------------------------------------------------------------------------|--------------------------------------------------------------------------|------------------------------------------------------------------------|
| Relevant outcome to stakeholders (defined as PLWD or care partner) | High: Most stakeholders (PLWD and/or care partners) are likely to believe the outcomes are useful. | Medium: Some stakeholders are likely to believe the outcomes are useful. | Low: Stakeholders are unlikely to believe that the outcomes are useful |
|--------------------------------------------------------------------|----------------------------------------------------------------------------------------------------|--------------------------------------------------------------------------|------------------------------------------------------------------------|

### Overview of Included Studies

| Author                                                                                   | PLCI Population & Stage of Dementia | Target of the Intervention                                 | Sample Size                                                                                | Setting | Design                                         | ACP Intervention                                                                                                                                                                                                                                                                                                                                                                                                                                                                                                                                                                                                                                                                                                                                                      |
|------------------------------------------------------------------------------------------|-------------------------------------|------------------------------------------------------------|--------------------------------------------------------------------------------------------|---------|------------------------------------------------|-----------------------------------------------------------------------------------------------------------------------------------------------------------------------------------------------------------------------------------------------------------------------------------------------------------------------------------------------------------------------------------------------------------------------------------------------------------------------------------------------------------------------------------------------------------------------------------------------------------------------------------------------------------------------------------------------------------------------------------------------------------------------|
| Lamppu et al (2021), Finland <sup>1</sup>                                                | NH residents, Advanced Stage        | Staff at NH and providers                                  | N=324 (intervention n=151; control n=173)                                                  | NH      | Cluster-randomized controlled trial            | The intervention was delivered by a single geriatrician that targeted NH staff and providers(MD,NP,PA) which consisted of 4 small-group 4-hour educational sessions on the principles of palliative and end-of-life care (advance care planning, adverse effects of hospitalizations, symptom management, communication, supporting proxies, challenging situations) to intervention group staff members (RN, LPN) & providers. There was no linkage to the EHR.                                                                                                                                                                                                                                                                                                      |
| Sævareid et al (2019), Norway <sup>2</sup>                                               | NH residents, Mixed Stage           | NH Residents, Caregivers/Surrogate, NH staff and providers | N=151 (intervention n=76; control n=75)                                                    | NH      | Pair-matched Cluster randomized clinical trial | Using a train-the trainer model, NH staff and providers (MD,NP, PA)were targeted to complete (1) a 2-day training seminar for the project teams, which included a presentation, discussion and use of the guide through role-play. Research team provided supervision and follow-up of the project teams, written information to patients and next of kin and an information meeting about the project for ward staff, (2) a pocket card (a short version of the guide) for spontaneous conversations about ACP-issues in everyday situations and a template on how to document ACP was provided, (3) in-person ACP discussion. There was linkage to EHR.                                                                                                             |
| Aasmul et al (2018), Norway <sup>3</sup><br><br>Husebø et al (2019), Norway <sup>4</sup> | NH residents, Mixed Stage           | NH staff and providers                                     | Total: 67 units (n=723) (intervention Arm: 36 units (n=394) control Arm: 31 units (n=329)) | NH      | Cluster-randomized controlled trial            | COSMOS interventions was delivered by the research team and nurse ambassadors and targeted the nursing home staff (nurses, managers)& providers (MD,NP, PA); this consisted of 2 days educational seminar (7.5 hours per day) at the beginning of the intervention followed by 20-minute lunch meetings and repeated these meetings several times a week. The weekly focus were the “red week” for advance care planning, “blue” for systematic assessment and treatment of pain, “yellow” for medication review, and “green” for organization of activities. Staff members were encouraged to participate in at least 1 weekly session over 4 months. Further, the staff participated actively in the systematic medication review. There was no linkage to the EHR. |

| Author                                          | PLCI Population & Stage of Dementia                            | Target of the Intervention             | Sample Size                                                                                       | Setting    | Design                                           | ACP Intervention                                                                                                                                                                                                                                                                                                                                                                                                                                                                                                                      |
|-------------------------------------------------|----------------------------------------------------------------|----------------------------------------|---------------------------------------------------------------------------------------------------|------------|--------------------------------------------------|---------------------------------------------------------------------------------------------------------------------------------------------------------------------------------------------------------------------------------------------------------------------------------------------------------------------------------------------------------------------------------------------------------------------------------------------------------------------------------------------------------------------------------------|
| Martin et al (2019), Australia <sup>5</sup>     | NH residents, Mixed Stage                                      | NH residents, Caregivers/Surrogate,    | N=326 (intervention n=181; control n=145)                                                         | NH         | Cluster randomized controlled trial              | The Goals of patient care (GOPC) intervention was completed by a geriatrician & the lead investigator in the project, who thoroughly reviewed all NH residents including notes, completion of baseline characteristics and assessments, review of any prior ACP documents they had completed, discussion of current health status with health care staff, and discussion with the NH resident about his or her health care goals, values and preferences. GOPC form was used to document discussion. There was no linkage to the EHR. |
| Tilburgs et al (2020), Netherlands <sup>6</sup> | Community-dwelling PLCI, Mixed Stage                           | Providers for PLCI                     | Total n = 38 GPs, n=140 PLCI (intervention n = 19 GPs, n= 73 PLCI, control n = 19 GPs, n=67 PLCI) | Outpatient | Cluster randomized controlled trial              | Shared Decision making (SDM) intervention was delivered by research team/educators, the targeted population was general practitioners(GPs) caring for PLCI, the intervention consisted of 2 workshops (3 hour each length) that used variety interactive strategies to teach SDM for ACP. There was no linkage to the EHR.                                                                                                                                                                                                            |
| Goossens et al (2020), Belgium <sup>7</sup>     | NH residents, Mixed Stage                                      | NH providers and staff                 | N= 65 wards (n=311 staff/providers) (intervention n=34 wards; control n=31 wards)                 | NH         | Pre-posttest Cluster randomized controlled trial | We DECide intervention was delivered by research team/educators, the targeted population was NH providers, the intervention consisted of 2 workshops (4 hours each in length) on SDM and homework assignment covering: (1) theoretical information on ACP and SDM, (2) role playing exercises and (3) reviewing the internal ACP policy. There was no linkage to the EHR.                                                                                                                                                             |
| Brazil et al (2018), UK <sup>8</sup>            | NH residents, Mixed Stage, but lacked decision making capacity | Registered nurse, Caregivers/Surrogate | N=24 NHs (intervention n=12; control n=12)                                                        | NH         | Paired Cluster randomized controlled trial       | The intervention was delivered by a trained ACP facilitator (who was registered nurse who was trained using Respecting choices), the target of the intervention was caregivers/surrogates of PLCI. The intervention consisted of 2 family meetings, a booklet was mailed to caregivers (comfort care at the end of life) prior to family meetings, & documentation of ACP decisions using a standardized ACP form. There was no linkage to the EHR.                                                                                   |
| Song et al (2019), USA <sup>9</sup>             | Community-dwelling PLCI, Mixed Stage, but with capacity        | PLCI and caregivers/surrogate          | N=23 dyads                                                                                        | Outpatient | Randomized control trial                         | The Spirit intervention was delivered by trained social worker, the targeted population was PLCI and their caregiver/surrogate. The Spirit intervention was a 60-minute, structured psychoeducational intervention which was adapted version of “sharing patient’s illness representations to increase trust (spirit)” provided in a face-to-face or videoconferencing interview format. A goals of care tool was completed after the interview. There was no linkage to the EHR.                                                     |

| Author                                            | PLCI Population & Stage of Dementia                                              | Target of the Intervention   | Sample Size                                      | Setting      | Design                              | ACP Intervention                                                                                                                                                                                                                                                                                                                                                                                                                                                                                                                                                                                                                           |
|---------------------------------------------------|----------------------------------------------------------------------------------|------------------------------|--------------------------------------------------|--------------|-------------------------------------|--------------------------------------------------------------------------------------------------------------------------------------------------------------------------------------------------------------------------------------------------------------------------------------------------------------------------------------------------------------------------------------------------------------------------------------------------------------------------------------------------------------------------------------------------------------------------------------------------------------------------------------------|
| Van den Block et al (2020), Belgium <sup>10</sup> | NH residents, Did not specify stage                                              | NH staff and Providers       | N=78 NH (Intervention n=38 NH, Control n= 39 NH) | NH           | Cluster randomized controlled trial | The PACE Steps to Success intervention was delivered by trained research team (using train the trainer approach). the targeted population was nursing home staff; intervention consisted of 6 (90 minute) components to be delivered over 1 years that focused on (1) advance care planning with residents and family, (2) assessment, care planning, and review of needs and problems, (3) coordination of care via monthly multidisciplinary review meetings,(4) delivery of high-quality care focusing on pain and depression, (5) care in the last days of life, and (6) care after death. This was not embedded or linked to the EHR. |
| Whitlatch et al (2019), USA <sup>11</sup>         | Community-dwelling PLCI, Early Stage                                             | PLCI and caregiver/surrogate | N=128 (Intervention n=84; control n=44)          | Home Setting | Randomized control trial            | The SHARE intervention consisted of 6 psychoeducational sessions; delivered by trained counselors; targeted to patients and their caregivers; six-sessions of psychoeducational counseling versus a single in-home training session with goal of creating an agreed-upon plan of future care intended to address predictable problems associated with dementia. There was no link to the EHR.                                                                                                                                                                                                                                              |
| Gabbard et al (2021), USA <sup>12</sup>           | Community-dwelling PLCI, Early Stage                                             | PLCI and caregiver/surrogate | N= 765 (Intervention n = 379; control n = 380).  | Outpatient   | Pragmatic, Randomized control trial | IMPACT intervention was delivered by embedded nurse navigators and primary care providers, the targeted population was patients 65 and older who had multimorbidity plus either impairments in physical function, cognitive impairment, and/or frailty, this consisted of a telephone based ACP pre-visit discussion led by a nurse navigator followed by in-person dyad (patient + surrogate) PCP visit to discuss ACP during their annual wellness visit. This was linked to the EHR, providers used a standardized documentation program (ACPWise) to discuss, document, and bill ACP.                                                  |
| Hanson et al (2011), USA <sup>13</sup>            | NH residents, Advanced Stage                                                     | Caregivers/surrogates        | N=256 (Intervention n=127; control n=129)        | NH           | Cluster randomized controlled trial | The intervention was a decisional aid; delivered by research team; targeted to patients' surrogates; surrogates reviewed a structured decision aid (audio or print) on feeding options and outcomes for patients with advanced dementia or received usual care (control). There was no link to the EHR.                                                                                                                                                                                                                                                                                                                                    |
| Sampson et al (2011), London, UK <sup>14</sup>    | Mixed (either Community-dwelling PLCI or Nursing Home Residents), Advanced Stage | Caregiver/surrogate          | N=33 (Intervention n= 22; control n= 11)         | In-patient   | Cluster randomized controlled trial | The intervention delivered by senior nurse with palliative care training consisted of up to 4 structured face-to-face discussions, a booklet, a palliative care needs assessment, documentation of discussions, and communication with primary team. There was no linkage to the EHR.                                                                                                                                                                                                                                                                                                                                                      |



| Author                                                                                                                     | PLCI Population & Stage of Dementia                                              | Target of the Intervention   | Sample Size                                                               | Setting      | Design                                        | ACP Intervention                                                                                                                                                                                                                                                                                                                                                                                                                                                                                                                                                                                                                        |
|----------------------------------------------------------------------------------------------------------------------------|----------------------------------------------------------------------------------|------------------------------|---------------------------------------------------------------------------|--------------|-----------------------------------------------|-----------------------------------------------------------------------------------------------------------------------------------------------------------------------------------------------------------------------------------------------------------------------------------------------------------------------------------------------------------------------------------------------------------------------------------------------------------------------------------------------------------------------------------------------------------------------------------------------------------------------------------------|
| Reinhardt et al (2014), USA <sup>15</sup>                                                                                  | NH residents, Advanced Stage                                                     | Caregiver/surrogate          | N=110 (Intervention n=58; control n=52)                                   | NH           | Randomized controlled trial                   | The intervention delivered by palliative care physician and social worker consisted of structured ACP face-to-face meetings using “ask-tell-ask” model targeted towards caregivers/surrogates, followed by 3 phone contacts( every 2 months) to check on PLCI, continued discussions, and answer any questions. There was no linkage to the EHR.                                                                                                                                                                                                                                                                                        |
| Loizeau et al (2019), Switzerland <sup>16</sup>                                                                            | Mixed (either Community-dwelling PLCI or Nursing Home Residents), Advanced Stage | Caregiver/surrogate          | N=232 (Intervention n=114, control N=118)                                 | Home Setting | Randomized controlled trial                   | The DEMFACT intervention delivered by researchers consisted was decisional support tool intervention using Fact Boxes ( 2 page, pocket-size brochure) in advanced dementia for decisions related to the use of (1) antibiotics for pneumonia and (2) artificial hydration; targeted towards caregivers/surrogates. There was no linkage to the EHR.                                                                                                                                                                                                                                                                                     |
| Mitchell et al (2020), USA <sup>17</sup><br>Loomer at al (2021), USA <sup>18</sup><br>Moyo et al (2021), USA <sup>19</sup> | NH residents, Advanced Stage                                                     | PLCI and caregiver/surrogate | N=360 NHs (N = 119 intervention, N = 241 control)                         | NH           | Pragmatic, Cluster randomized clinical trial. | The PROVEN intervention consisted of five short videos on a tablet offered by NH champions/staff (mostly social worker) to NH residents and their proxies in English or Spanish: (1) general goals of care; (2) goals of care for advanced dementia; (3) hospice; (4) hospitalization; and (5) ACP for health patients delivered by nursing home to patients (or their proxies) at the following time points: (1) within 7 days of admission or readmission, (2) when decisions arose for which there was a specific video (e.g., hospice), and (3) special circumstances (e.g., major health status change). There was linkage to EHR. |
| Mitchell et al (2018), USA <sup>20</sup><br>Cohen et al. (2019),USA <sup>21</sup>                                          | NH residents, Advanced Stage                                                     | PLCI and caregiver/surrogate | N=402 dyads (intervention arm, n = 212 dyads; control arm, n = 190 dyads) | NH           | Parallel, Cluster randomized clinical trial   | The EVINCE intervention delivered by research assistant consisted of a 12-minute ACP video for proxies and pro-vision of a form to the residents’ primary care team indicating the proxy’s preferred level of care after viewing the video. There was no linkage to EHR                                                                                                                                                                                                                                                                                                                                                                 |

| Author                                     | PLCI Population & Stage of Dementia     | Target of the Intervention                        | Sample Size                                                                             | Setting           | Design                                            | ACP Intervention                                                                                                                                                                                                                                                                                                                                                                                                                                                                                                                                                                                                                                                                                                                                 |
|--------------------------------------------|-----------------------------------------|---------------------------------------------------|-----------------------------------------------------------------------------------------|-------------------|---------------------------------------------------|--------------------------------------------------------------------------------------------------------------------------------------------------------------------------------------------------------------------------------------------------------------------------------------------------------------------------------------------------------------------------------------------------------------------------------------------------------------------------------------------------------------------------------------------------------------------------------------------------------------------------------------------------------------------------------------------------------------------------------------------------|
| Agar et al (2017), Australia <sup>22</sup> | NH residents, Advanced Stage            | Nursing Staff, Providers, and Caregiver/surrogate | N=186 (Intervention n=130 ; control n=156)                                              | NH                | Parallel Cluster randomized clinical trial        | The facilitated family case conferencing (FCC ) intervention delivered by a Registered Nurse trained as a Palliative Care Planning Coordinator consisted a facilitated case conferencing which involved: (1) identify residents with advanced dementia likely to benefit from a case conference; 2) organize, set an agenda, chair and document case conferences with optimal participation 3) develop and oversaw implementation of palliative care plans; and 4) trained nursing and direct care staff in person-centered palliative care) delivered by registered nurse in nursing home to family, multi-disciplinary nursing home staff and external health professionals (e.g. General Practitioner's (GP's)). There was no linkage to EHR. |
| Hanson et al (2017), USA <sup>23</sup>     | NH residents, Advanced Stage            | Caregiver/surrogate                               | N= 22 NHs, 302 dyads (Intervention n = 11 NHs, 151 dyads; Control n = 11 NHs,151 dyads) | NH                | Cluster randomized clinical trial                 | The goals of care (GOC) decision aid intervention delivered by research staff and interdisciplinary team members targeted towards caregivers/surrogates of PLCI consisted of 1) nursing home staff receiving 1 hour educational sessions on decisional aid, ACP, and role playing and 2) an 18 minutes GOC video decision aid followed by a structured GOC discussion with a member from nurse home interdisciplinary team. There was a linkage to the EHR.                                                                                                                                                                                                                                                                                      |
| Bonner et al (2021), USA <sup>24</sup>     | Community-dwelling PLCI, Moderate Stage | Caregiver/surrogate                               | N=358 (Intervention n=173; control n=185)                                               | Community setting | Cluster randomized clinical trial                 | The Advance Care Treatment Plan (ACT-Plan) intervention was a community-based educational intervention delivered by advanced practice public health professionals targeted towards African-American caregivers of PLCI which consisted of 4 (1-hour in length) in-person classes with homework and discussions about dementia disease trajectory, CPR, mechanical ventilation, and tube feeding. There was no linkage to EHR.                                                                                                                                                                                                                                                                                                                    |
| Hilgeman et al (2014), USA <sup>25</sup>   | Community Dwelling PLWD, Early Staged   | PLCI and caregiver/surrogate                      | N=18 (Intervention: n=10; control: n=8)                                                 | Home setting      | RCT 2 group comparison with blocked randomization | Preserving Identity and Planning for Advance Care (PIPAC) intervention; delivered by research team and licensed clinical psychologist, the targeted population was PLCI + caregivers, this consisted of 4 in-home sessions over 4-6 weeks that focused on reminiscence and future planning or the minimal support phone contact comparison group (control). There was no link to the EHR.                                                                                                                                                                                                                                                                                                                                                        |

\* Note. PLCI= persons living with cognitive impairment, ACP = advance care planning, RCT = randomized controlled trial, UK = United Kingdom, USA = United States of America, NH= Nursing Home, SDM= Shared Decision making, Providers (means doctor of medicine (MD), nurse practitioner (NP), and/or physician assistant (PA)).

## References:

1. Lamppu PJ, Finne-Soveri H, Kautiainen H, Laakkonen ML, Laurila JV, Pitkälä KH. Effects of Staff Training on Nursing Home Residents' End-Of-Life Care: A Randomized Controlled Trial. *J Am Med Dir Assoc*. Aug 2021;22(8):1699-1705.e1. doi:10.1016/j.jamda.2021.05.019
2. Sævareid TJL, Thoresen L, Gjerberg E, Lillemoen L, Pedersen R. Improved patient participation through advance care planning in nursing homes—A cluster randomized clinical trial. *Patient Educ Couns*. 2019/12/01/ 2019;102(12):2183-2191. doi:<https://doi.org/10.1016/j.pec.2019.06.001>
3. Aasmul I, Husebo BS, Sampson EL, Flo E. Advance Care Planning in Nursing Homes - Improving the Communication Among Patient, Family, and Staff: Results From a Cluster Randomized Controlled Trial (COSMOS). *Front Psychol*. 2018;9:2284. doi:10.3389/fpsyg.2018.02284
4. Husebø BS, Ballard C, Aarsland D, et al. The Effect of a Multicomponent Intervention on Quality of Life in Residents of Nursing Homes: A Randomized Controlled Trial (COSMOS). *J Am Med Dir Assoc*. 2019/03/01/ 2019;20(3):330-339. doi:<https://doi.org/10.1016/j.jamda.2018.11.006>
5. Martin RS, Hayes BJ, Hutchinson A, Tacey M, Yates P, Lim WK. Introducing Goals of Patient Care in Residential Aged Care Facilities to Decrease Hospitalization: A Cluster Randomized Controlled Trial. *J Am Med Dir Assoc*. 2019/10/01/ 2019;20(10):1318-1324.e2. doi:<https://doi.org/10.1016/j.jamda.2019.06.017>
6. Tilburgs B, Koopmans R, Vernooij-Dassen M, et al. Educating Dutch General Practitioners in Dementia Advance Care Planning: A Cluster Randomized Controlled Trial. *J Am Med Dir Assoc*. Jun 2020;21(6):837-842.e4. doi:10.1016/j.jamda.2019.09.010
7. Goossens B, Sevenants A, Declercq A, Van Audenhove C. Improving shared decision-making in advance care planning: Implementation of a cluster randomized staff intervention in dementia care. *Patient Educ Couns*. 2020/04/01/ 2020;103(4):839-847. doi:<https://doi.org/10.1016/j.pec.2019.11.024>
8. Brazil K, Carter G, Cardwell C, et al. Effectiveness of advance care planning with family carers in dementia nursing homes: A paired cluster randomized controlled trial. *Palliat Med*. Mar 2018;32(3):603-612. doi:10.1177/0269216317722413
9. Can Persons with Dementia Meaningfully Participate in Advance Care Planning Discussions? A Mixed-Methods Study of SPIRIT. *J Palliat Med*. 2019;22(11):1410-1416. doi:10.1089/jpm.2019.0088
10. Van den Block L, Honinx E, Pivodic L, et al. Evaluation of a Palliative Care Program for Nursing Homes in 7 Countries: The PACE Cluster-Randomized Clinical Trial. *JAMA Intern Med*. Feb 1 2020;180(2):233-242. doi:10.1001/jamainternmed.2019.5349
11. Whitlatch CJ, Heid AR, Femia EE, Orsulic-Jeras S, Szabo S, Zarit SH. The Support, Health, Activities, Resources, and Education program for early stage dementia: Results from a randomized controlled trial. *Dementia*. 2019;18(6):2122-2139. doi:10.1177/1471301217743033
12. Gabbard J, Pajewski NM, Callahan KE, et al. Effectiveness of a Nurse-Led Multidisciplinary Intervention vs Usual Care on Advance Care Planning for Vulnerable Older Adults in an Accountable Care Organization: A Randomized Clinical Trial. *JAMA Internal Medicine*. 2021;181(3):361-369. doi:10.1001/jamainternmed.2020.5950
13. Hanson LC, Carey TS, Caprio AJ, et al. Improving decision-making for feeding options in advanced dementia: a randomized, controlled trial. *J Am Geriatr Soc*. Nov 2011;59(11):2009-16. doi:10.1111/j.1532-5415.2011.03629.x

14. Sampson EL, Jones L, Thuné-Boyle IC, et al. Palliative assessment and advance care planning in severe dementia: an exploratory randomized controlled trial of a complex intervention. *Palliat Med*. Apr 2011;25(3):197-209. doi:10.1177/0269216310391691
15. Reinhardt JP, Chichin E, Posner L, Kassabian S. Vital Conversations with Family in the Nursing Home: Preparation for End-Stage Dementia Care. *Journal of Social Work in End-of-Life & Palliative Care*. 2014/04/03 2014;10(2):112-126. doi:10.1080/15524256.2014.906371
16. Loizeau AJ, Theill N, Cohen SM, et al. Fact Box decision support tools reduce decisional conflict about antibiotics for pneumonia and artificial hydration in advanced dementia: a randomized controlled trail. *Age Ageing*. Jan 1 2019;48(1):67-74. doi:10.1093/ageing/afy149
17. Mitchell SL, Volandes AE, Gutman R, et al. Advance Care Planning Video Intervention Among Long-Stay Nursing Home Residents: A Pragmatic Cluster Randomized Clinical Trial. *JAMA Internal Medicine*. 2020;180(8):1070-1078. doi:10.1001/jamainternmed.2020.2366
18. Loomer L, Ogarek JA, Mitchell SL, et al. Impact of an Advance Care Planning Video Intervention on Care of Short-Stay Nursing Home Patients. *J Am Geriatr Soc*. 2021;69(3):735-743. doi:<https://doi.org/10.1111/jgs.16918>
19. Moyo P, Loomer L, Teno JM, et al. Effect of a Video-Assisted Advance Care Planning Intervention on End-of-Life Health Care Transitions Among Long-Stay Nursing Home Residents. *J Am Med Dir Assoc*. 2022/03/01/ 2022;23(3):394-398. doi:<https://doi.org/10.1016/j.jamda.2021.09.014>
20. Mitchell SL, Shaffer ML, Cohen S, Hanson LC, Habtemariam D, Volandes AE. An Advance Care Planning Video Decision Support Tool for Nursing Home Residents With Advanced Dementia: A Cluster Randomized Clinical Trial. *JAMA Internal Medicine*. 2018;178(7):961-969. doi:10.1001/jamainternmed.2018.1506
21. Cohen SM, Volandes AE, Shaffer ML, Hanson LC, Habtemariam D, Mitchell SL. Concordance Between Proxy Level of Care Preference and Advance Directives Among Nursing Home Residents With Advanced Dementia: A Cluster Randomized Clinical Trial. *J Pain Symptom Manage*. Jan 2019;57(1):37-46.e1. doi:10.1016/j.jpainsymman.2018.09.018
22. Agar M, Luckett T, Luscombe G, et al. Effects of facilitated family case conferencing for advanced dementia: A cluster randomised clinical trial. *PLoS One*. 2017;12(8):e0181020. doi:10.1371/journal.pone.0181020
23. Hanson LC, Zimmerman S, Song M-K, et al. Effect of the Goals of Care Intervention for Advanced Dementia: A Randomized Clinical Trial. *JAMA Internal Medicine*. 2017;177(1):24-31. doi:10.1001/jamainternmed.2016.7031
24. Bonner GJ, Freels S, Ferrans C, et al. Advance Care Planning for African American Caregivers of Relatives With Dementias: Cluster Randomized Controlled Trial. *Am J Hosp Palliat Care*. Jun 2021;38(6):547-556. doi:10.1177/1049909120916127
25. Hilgeman MM, Allen RS, Snow AL, Durkin DW, DeCoster J, Burgio L. Preserving Identity and Planning for Advance Care (PIPAC): preliminary outcomes from a patient-centered intervention for individuals with mild dementia. *Aging Ment Health*. 2014/05/19 2014;18(4):411-424. doi:10.1080/13607863.2013.868403

**Primary Outcome Measures (n=39)**

| Name of Outcome Measure (First Author et al (year))                                                                                                                          | ACP Outcome Domain<br>Categories:<br>Process,<br>Action.<br>Quality of<br>Care, or<br>healthcare<br>outcomes | # of Items | Completion Time | Literacy | Cost & Copyright    | Validated (yes or no) | Data Capture Burden Scoring, Interpretation, & Extraction (e.g., EHR data or routinely collected data)<br>Categories:<br>Low, Moderate, High | How likely is the outcome to be relevant to Stakeholders?<br>Categories:<br>Low, Medium, High | Summary of the Pragmatic Characteristics of the outcome measure<br>Categories:<br>Low, Moderate, High                                                              |
|------------------------------------------------------------------------------------------------------------------------------------------------------------------------------|--------------------------------------------------------------------------------------------------------------|------------|-----------------|----------|---------------------|-----------------------|----------------------------------------------------------------------------------------------------------------------------------------------|-----------------------------------------------------------------------------------------------|--------------------------------------------------------------------------------------------------------------------------------------------------------------------|
| <b>Action: 4 Outcomes</b>                                                                                                                                                    |                                                                                                              |            |                 |          |                     |                       |                                                                                                                                              |                                                                                               |                                                                                                                                                                    |
| ACP conversation & documentation<br><br>Tilburgs et al (2020), Netherlands<br>Gabbard et al (2021), USA<br>Sævareid et al (2019), Norway<br>Sampson et al (2011), London, UK | Action                                                                                                       | 1          | NS              |          |                     | No                    | Low-High<br><br>○ Depending if a standardized EHR tool is utilized or not, if not, then burden is high requiring manual chart review.        | High<br><br>○ most report wanting to discuss ACP.                                             | Potentially Highly<br><br>○ If standardized EHR embedded tool is utilized. If not, then would have require manual chart review which would not be pragmatic.       |
| Communication activities and type<br><br>Aasmul et al (2018), Norway                                                                                                         | Action                                                                                                       | 5          | NS              | NS       | NS                  | No                    | High<br><br>○ requires the nurse to track 5 different communication ACP activities over a one month between                                  | High<br><br>○ most report wanting to discuss ACP                                              | Low<br><br>○ Requires self-report from nursing staff to track 5 different communication ACP activities over a one month between, not easily embedded into the EHR. |
| Preferences for Care Tasks Scale (PCTS) and care plan<br><br>Whitlatch et al (2019), USA                                                                                     | Action                                                                                                       | 19         | NS              | NS       | No cost & copyright | No                    | High<br><br>○ requires PLCI to state who they were prefer to help them with 19 different care task, not                                      | Medium<br><br>○ some would believe preferences are important.                                 | Low<br><br>○ requires self-report from PLCI on 19 different care tasks, not routinely collected data,                                                              |

| <b>Name of Outcome Measure (First Author et al (year))</b>                                           | <b>ACP Outcome Domain</b><br>Categories:<br>Process,<br>Action.<br>Quality of<br>Care, or<br>healthcare<br>outcomes | <b># of Items</b> | <b>Completion Time</b> | <b>Literacy</b> | <b>Cost &amp; Copyright</b> | <b>Validated (yes or no)</b> | <b>Data Capture Burden Scoring, Interpretation, &amp; Extraction (e.g., EHR data or routinely collected data)</b><br>Categories:<br>Low, Moderate, High | <b>How likely is the outcome to be relevant to Stakeholders?</b><br>Categories:<br>Low, Medium, High | <b>Summary of the Pragmatic Characteristics of the outcome measure</b><br>Categories:<br>Low, Moderate, High    |
|------------------------------------------------------------------------------------------------------|---------------------------------------------------------------------------------------------------------------------|-------------------|------------------------|-----------------|-----------------------------|------------------------------|---------------------------------------------------------------------------------------------------------------------------------------------------------|------------------------------------------------------------------------------------------------------|-----------------------------------------------------------------------------------------------------------------|
|                                                                                                      |                                                                                                                     |                   |                        |                 |                             |                              | routinely collected data.                                                                                                                               |                                                                                                      | possibly could be embedded into the EHR.                                                                        |
| Written care plan about CPR, MV, and TF<br><br>Bonner et al (2021), USA                              | Action                                                                                                              | 3                 | NS                     | NS              | NS                          | No                           | Moderate<br><br>○ requires surrogate to complete care plan regarding CPR, MV, and TF.                                                                   | High<br><br>○ most feel ACP is important                                                             | Moderate<br><br>○ dichotomous (yes/no) 3-item questionnaire which could be embedded into the EHR easily.        |
| <b>Healthcare: 20 Outcomes</b>                                                                       |                                                                                                                     |                   |                        |                 |                             |                              |                                                                                                                                                         |                                                                                                      |                                                                                                                 |
| Bath Assessment of Subjective Quality of Life in Dementia (BASQID)<br><br>Hilgeman et al (2014), USA | Health care outcomes                                                                                                | 14                | NS                     | NS              | NS                          | Yes                          | High<br><br>○ requires proxies to self-report 14 items on 5 point Likert scale about quality of life, not routinely collected nor embedded in the EHR   | High<br><br>○ most would find quality of life important                                              | Low<br><br>○ high data capture burden, not routinely collected, and could be challenging to embed into the EHR. |
| Quality of Life in Alzheimer's Disease scale(QOL-AD)<br><br>Hilgeman et al (2014), USA               | Health care outcomes                                                                                                | 13                | NS                     | NS              | Copyright but no cost       | Yes                          | High<br><br>○ requires proxies to self-report 13 items about quality of life, not routinely collected nor embedded in the EHR                           | High,<br><br>○ most would find quality of life important                                             | Low<br><br>○ high data capture burden, not routinely collected, and could be challenging to embed into the EHR. |

| <b>Name of Outcome Measure (First Author et al (year))</b>                         | <b>ACP Outcome Domain</b><br>Categories:<br>Process,<br>Action.<br>Quality of<br>Care, or<br>healthcare<br>outcomes | <b># of Items</b>                                                   | <b>Completion Time</b> | <b>Literacy</b> | <b>Cost &amp; Copyright</b> | <b>Validated (yes or no)</b> | <b>Data Capture Burden Scoring, Interpretation, &amp; Extraction (e.g., EHR data or routinely collected data)</b><br>Categories:<br>Low, Moderate, High | <b>How likely is the outcome to be relevant to Stakeholders?</b><br>Categories:<br>Low, Medium, High | <b>Summary of the Pragmatic Characteristics of the outcome measure</b><br>Categories:<br>Low, Moderate, High    |
|------------------------------------------------------------------------------------|---------------------------------------------------------------------------------------------------------------------|---------------------------------------------------------------------|------------------------|-----------------|-----------------------------|------------------------------|---------------------------------------------------------------------------------------------------------------------------------------------------------|------------------------------------------------------------------------------------------------------|-----------------------------------------------------------------------------------------------------------------|
| Health-related Quality of Life (15D)<br><br>Lamppu et al (2021), Finland           | Health care outcomes                                                                                                | 15                                                                  | NS                     | NS              | Copyright but no cost       | Yes                          | High<br><br>○ requires proxies to self-report 15 items about quality of life, not routinely collected nor embedded in the EHR                           | High<br><br>○ most would find quality of life important                                              | Low<br><br>○ high data capture burden, not routinely collected, and could be challenging to embed into the EHR. |
| Quality of life dementia scale (QUALIDEM)<br><br>Husebø et al (2019), USA          | Health care outcomes                                                                                                | 37 or 18 depending on the version<br><br>18 was used in this study. | 10 minutes             | NS              | No cost nor copyright       | Yes                          | High<br><br>○ Requires skilled nursing staff to observe the patient for a week and score the patient, not routinely collected nor embedded in the EHR   | High<br><br>○ most would find quality of life important                                              | Low<br><br>○ high data capture burden, not routinely collected, and could be challenging to embed into the EHR. |
| Quality of life Scale Questionnaire (EuroQol 5D)<br><br>Hilgeman et al (2014), USA | Health care outcomes                                                                                                | 15                                                                  | NS                     | NS              | Copyright but no cost       | Yes                          | High<br><br>○ requires self-assessment or assessment by proxy, not routinely collected nor embedded in the EHR                                          | High<br><br>○ most would find quality of life important                                              | Low<br><br>○ high data capture burden, not routinely collected, and could be challenging to embed into the EHR. |

| <b>Name of Outcome Measure (First Author et al (year))</b>                   | <b>ACP Outcome Domain</b><br>Categories:<br>Process,<br>Action.<br>Quality of<br>Care, or<br>healthcare<br>outcomes | <b># of Items</b> | <b>Completion Time</b> | <b>Literacy</b> | <b>Cost &amp; Copyright</b> | <b>Validated (yes or no)</b> | <b>Data Capture Burden Scoring, Interpretation, &amp; Extraction (e.g., EHR data or routinely collected data)</b><br>Categories:<br>Low, Moderate, High | <b>How likely is the outcome to be relevant to Stakeholders?</b><br>Categories:<br>Low, Medium, High | <b>Summary of the Pragmatic Characteristics of the outcome measure</b><br>Categories:<br>Low, Moderate, High                     |
|------------------------------------------------------------------------------|---------------------------------------------------------------------------------------------------------------------|-------------------|------------------------|-----------------|-----------------------------|------------------------------|---------------------------------------------------------------------------------------------------------------------------------------------------------|------------------------------------------------------------------------------------------------------|----------------------------------------------------------------------------------------------------------------------------------|
| Quality of life–visual analog scale (EQ-VAS)<br><br>Husebø et al (2019), USA | Health care outcomes                                                                                                | 1                 | <5 minutes             | NS              | Copyright but no cost       | Yes                          | Moderate<br><br>○ easy to score & interpret, not routinely collected, could be embedded into the EHR                                                    | High<br><br>○ most would find quality of life important                                              | Moderate<br><br>○ Moderate data capture burden, low completion time, not routinely collected but could be embedded into the EHR. |
| Social engagement and withdrawal<br><br>Hilgeman et al (2014), USA           | Health care outcomes                                                                                                | 6                 | NS                     | NS              | NS                          | Yes                          | Low<br><br>○ routinely measured and collected in Minimum Data Set                                                                                       | Medium,<br><br>○ Some would find engagement important.                                               | High<br><br>○ routinely measured and collected in Minimum Data Set                                                               |
| Burdensome Treatment<br><br>Moyo et al (2021), USA                           | Health care outcomes                                                                                                | 1                 | NS                     |                 |                             |                              | Low<br><br>○ EHR data                                                                                                                                   | High<br><br>○ Most would find burdensome treatments important                                        | High<br><br>EHR data, no survey delivery burden.                                                                                 |



| <b>Name of Outcome Measure (First Author et al (year))</b>                                                       | <b>ACP Outcome Domain</b><br>Categories:<br>Process,<br>Action.<br>Quality of<br>Care, or<br>healthcare<br>outcomes | <b># of Items</b> | <b>Completion Time</b> | <b>Literacy</b> | <b>Cost &amp; Copyright</b> | <b>Validated (yes or no)</b> | <b>Data Capture Burden Scoring, Interpretation, &amp; Extraction (e.g., EHR data or routinely collected data)</b><br>Categories:<br>Low, Moderate, High | <b>How likely is the outcome to be relevant to Stakeholders?</b><br>Categories:<br>Low, Medium, High | <b>Summary of the Pragmatic Characteristics of the outcome measure</b><br>Categories:<br>Low, Moderate, High    |
|------------------------------------------------------------------------------------------------------------------|---------------------------------------------------------------------------------------------------------------------|-------------------|------------------------|-----------------|-----------------------------|------------------------------|---------------------------------------------------------------------------------------------------------------------------------------------------------|------------------------------------------------------------------------------------------------------|-----------------------------------------------------------------------------------------------------------------|
| Cornell Scale for Depression in Dementia<br><br>Hilgeman et al (2014), USA                                       | Health care outcomes                                                                                                | 19                | 30 minutes             | NS              | Copyright but no cost       | Yes                          | Moderate<br><br>○ not routinely collected or embedded to the EHR but could potentially be embedded.                                                     | High<br><br>○ most would find depression important.                                                  | Moderate<br><br>○ not routinely collected/embedded but has the potential to be embedded.                        |
| Depression-Patient Health Questionnaire (PHQ-9) scale<br><br>Reinhardt et al (2014), USA                         | Health care outcomes                                                                                                | 9                 | 5 minutes              | NS              | Copyright but no cost       | Yes                          | Low<br><br>○ routinely collected and embedded into most EHRs.                                                                                           | High<br><br>○ most would find depression important                                                   | High<br><br>○ routinely collected and embedded into most EHRs.                                                  |
| ED visits and hospitalizations<br><br>Martin et al (2019), Australia                                             | Health care outcomes                                                                                                |                   |                        |                 |                             |                              | Low<br><br>○ requires small amount of effort to extract from the EHR, routinely measured.                                                               | High<br><br>○ most would find ED visits and admissions important                                     | High<br><br>○ Routinely collected, requires minimal effort to extract from the EHR, no survey delivery burden.  |
| End-of-Life in Dementia scales-Comfort Assessment in Dying (EOLD-CAD)<br><br>Van den Block et al (2020), Belgium | Health care outcomes                                                                                                | 14                | NS                     | NS              | NS                          | NS                           | High<br><br>○ requires self-assessment or assessment by proxy, not routinely collected nor embedded in the EHR                                          | High<br><br>○ most would find comfort important                                                      | Low<br><br>○ high data capture burden, not routinely collected, and could be challenging to embed into the EHR. |

| <b>Name of Outcome Measure (First Author et al (year))</b>                                             | <b>ACP Outcome Domain</b><br>Categories:<br>Process, Action. Quality of Care, or healthcare outcomes | <b># of Items</b> | <b>Completion Time</b> | <b>Literacy</b> | <b>Cost &amp; Copyright</b> | <b>Validated (yes or no)</b> | <b>Data Capture Burden Scoring, Interpretation, &amp; Extraction (e.g., EHR data or routinely collected data)</b><br>Categories:<br>Low, Moderate, High | <b>How likely is the outcome to be relevant to Stakeholders?</b><br>Categories:<br>Low, Medium, High | <b>Summary of the Pragmatic Characteristics of the outcome measure</b><br>Categories:<br>Low, Moderate, High    |
|--------------------------------------------------------------------------------------------------------|------------------------------------------------------------------------------------------------------|-------------------|------------------------|-----------------|-----------------------------|------------------------------|---------------------------------------------------------------------------------------------------------------------------------------------------------|------------------------------------------------------------------------------------------------------|-----------------------------------------------------------------------------------------------------------------|
| Hospital-Length of stay<br><br>Lamppu et al (2021), Finland                                            | Health care outcomes                                                                                 | NA                | NS                     |                 |                             |                              | Low<br><br>○ requires small amount of effort to extract from the EHR, routinely measured.                                                               | High<br><br>○ most would find how long in hospital important.                                        | High-<br><br>○ Routinely collected, requires minimal effort to extract from the EHR, no survey delivery burden. |
| Hospital transfer<br><br>Moyo et al (2021), US<br>Loomer et al (2021), US<br>Mitchell et al (2020), US | Health care outcomes                                                                                 | NA                | NS                     |                 |                             |                              | Low<br><br>○ requires small amount of effort to extract from the EHR, routinely measured.                                                               | High<br><br>○ most would find hospital transfer important                                            | High<br><br>○ Routinely collected, requires minimal effort to extract from the EHR, no survey delivery burden.  |
| Emotional Support and Anticipated Support scale<br><br>Hilgeman et al (2014), USA                      | Health care outcomes                                                                                 | NS                | NS                     | NS              | NS                          | Yes                          | Unclear<br><br>○ minimal data was provided in the manuscript on the scale                                                                               | Medium<br><br>○ some might find emotional support important                                          | Low<br><br>○ not routinely collected nor embedded into the EHR. Required a proxy evaluation.                    |
| Late transitions<br><br>Moyo et al (2021), USA                                                         | Health care outcomes                                                                                 | 1                 | NS                     |                 |                             |                              | Low<br><br>○ requires small amount of effort to extract from the EHR, routinely measured.                                                               | High<br><br>○ most find late transitions important                                                   | High<br><br>○ Routinely collected, requires minimal effort to extract from the EHR, no survey delivery burden.  |

| <b>Name of Outcome Measure (First Author et al (year))</b>                                      | <b>ACP Outcome Domain</b><br>Categories:<br>Process,<br>Action.<br>Quality of<br>Care, or<br>healthcare<br>outcomes | <b># of Items</b> | <b>Completion Time</b> | <b>Literacy</b> | <b>Cost &amp; Copyright</b> | <b>Validated (yes or no)</b> | <b>Data Capture Burden Scoring, Interpretation, &amp; Extraction (e.g., EHR data or routinely collected data)</b><br>Categories:<br>Low, Moderate, High | <b>How likely is the outcome to be relevant to Stakeholders?</b><br>Categories:<br>Low, Medium, High | <b>Summary of the Pragmatic Characteristics of the outcome measure</b><br>Categories:<br>Low, Moderate, High |
|-------------------------------------------------------------------------------------------------|---------------------------------------------------------------------------------------------------------------------|-------------------|------------------------|-----------------|-----------------------------|------------------------------|---------------------------------------------------------------------------------------------------------------------------------------------------------|------------------------------------------------------------------------------------------------------|--------------------------------------------------------------------------------------------------------------|
| Meaning in Life Scale<br><br>Hilgeman et al (2014), USA                                         | Health care outcomes                                                                                                | 15                | NS                     | NS              | NS                          | Yes                          | High<br><br>○ requires self-assessment or assessment by proxy, not routinely collected nor embedded in the EHR                                          | Medium<br><br>○ some would find having a sense of meaning in life important.                         | Low<br><br>○ not routinely collected nor embedded into the EHR. Required a proxy evaluation.                 |
| Do-Not-Rehospitalize (DNH) directives<br><br>Mitchell et al (2018), USA                         | Health care outcomes                                                                                                | 1                 | NS                     |                 |                             |                              | Moderate<br><br>○ not routinely collected or embedded to the EHR but could potentially be embedded.                                                     | High<br><br>○ most would want to make sure others know they don't want to be transferred             | Moderate<br><br>○ not routinely collected/embedded but has the potential to be embedded.                     |
| Symptom Management at the End of Life in Dementia (SM-EOLD)<br><br>Agar et al (2017), Australia | Health care outcomes                                                                                                | 9                 | NS                     | NS              | NS                          | Yes                          | High<br><br>○ requires assessment by proxy, not routinely collected nor embedded in the EHR                                                             | High<br><br>○ most would feel management of symptoms important                                       | Low<br><br>○ requires assessment by proxy, not routinely collected nor embedded in the EHR                   |

| <b>Name of Outcome Measure (First Author et al (year))</b>                                                                                                                  | <b>ACP Outcome Domain</b><br>Categories:<br>Process,<br>Action.<br>Quality of<br>Care, or<br>healthcare<br>outcomes | <b># of Items</b> | <b>Completion Time</b> | <b>Literacy</b>             | <b>Cost &amp; Copyright</b> | <b>Validated (yes or no)</b> | <b>Data Capture Burden Scoring, Interpretation, &amp; Extraction (e.g., EHR data or routinely collected data)</b><br>Categories:<br>Low, Moderate, High | <b>How likely is the outcome to be relevant to Stakeholders?</b><br>Categories:<br>Low, Medium, High | <b>Summary of the Pragmatic Characteristics of the outcome measure</b><br>Categories:<br>Low, Moderate, High                                                                                                       |
|-----------------------------------------------------------------------------------------------------------------------------------------------------------------------------|---------------------------------------------------------------------------------------------------------------------|-------------------|------------------------|-----------------------------|-----------------------------|------------------------------|---------------------------------------------------------------------------------------------------------------------------------------------------------|------------------------------------------------------------------------------------------------------|--------------------------------------------------------------------------------------------------------------------------------------------------------------------------------------------------------------------|
| Occupational Disruptiveness scale<br><br>Aasmul et al (2018), Norway                                                                                                        | Health care outcomes                                                                                                | 12                | NS                     | NS                          | NS                          | Yes                          | High<br><br>○ requires assessment by proxy, not routinely collected nor embedded in the EHR                                                             | Medium<br><br>○ some would find management of disruptive behavioral important.                       | Low<br><br>○ requires assessment by proxy, not routinely collected nor embedded in the EHR                                                                                                                         |
| <b>Quality of Care: 10 outcomes</b>                                                                                                                                         |                                                                                                                     |                   |                        |                             |                             |                              |                                                                                                                                                         |                                                                                                      |                                                                                                                                                                                                                    |
| Clinical Global Impression of Change (CGIC)<br><br>Aasmul et al (2018), Norway                                                                                              | Quality of Care                                                                                                     | 1                 | NS                     | NS                          | NS                          | Yes                          | Moderate,<br><br>○ simple to score, simple to interpret, could potentially be embedded into the EHR                                                     | Medium<br><br>○ some would find treatment response important                                         | Moderate<br><br>○ simple to score, simple to interpret, could potentially be embedded into the EHR                                                                                                                 |
| Decisional Conflict Scale<br>Hilgeman et al (2014), USA<br>Loizeau et al (2019), Switzerland<br>Hanson et al (2011), US<br>Song et al (2019), US<br>Brazil et al (2018), UK | Quality of Care                                                                                                     | 16                | 5-10 minutes           | Below 8 <sup>th</sup> grade | No Cost nor Copyright       | Yes                          | Moderate<br><br>○ requires moderate effort to score and interpret. May be challenging to embed and extract from the electronic record.                  | Medium<br><br>○ some would find perceptions of uncertainty in choosing options important             | Low<br><br>○ measured with limited training, moderate time and effort required to ask caregivers to complete, and to link responses to a specific clinical decision, challenging to embed in the electronic record |

| <b>Name of Outcome Measure (First Author et al (year))</b>                                         | <b>ACP Outcome Domain</b><br>Categories:<br>Process, Action.<br>Quality of Care, or healthcare outcomes | <b># of Items</b> | <b>Completion Time</b> | <b>Literacy</b> | <b>Cost &amp; Copyright</b> | <b>Validated (yes or no)</b> | <b>Data Capture Burden Scoring, Interpretation, &amp; Extraction (e.g., EHR data or routinely collected data)</b><br>Categories:<br>Low, Moderate, High | <b>How likely is the outcome to be relevant to Stakeholders?</b><br>Categories:<br>Low, Medium, High | <b>Summary of the Pragmatic Characteristics of the outcome measure</b><br>Categories:<br>Low, Moderate, High                                                                          |
|----------------------------------------------------------------------------------------------------|---------------------------------------------------------------------------------------------------------|-------------------|------------------------|-----------------|-----------------------------|------------------------------|---------------------------------------------------------------------------------------------------------------------------------------------------------|------------------------------------------------------------------------------------------------------|---------------------------------------------------------------------------------------------------------------------------------------------------------------------------------------|
| Healthcare provider-surrogate goal concordance<br><br>Hanson et al (2017), USA                     | Quality of Care                                                                                         | 1                 | NS                     |                 |                             | No                           | Moderate<br><br>○ not routinely collected nor embedded into the EHR but low effort to score and interrupt.                                              | High<br><br>○ most would find concordance with clinicians on goals of care important                 | Moderate<br><br>○ not routinely collected nor embedded into the EHR, requires assessment from provider and proxy, may be challenging to embed and extract from the electronic record. |
| Quality of Communication (QOC) scores<br><br>Hanson et al (2017), USA<br>Gabbard et al (2021), USA | Quality of Care                                                                                         | 13                | NS                     | NS              | NS                          | Yes                          | Moderate<br><br>○ not routinely collected nor embedded into the EHR but low effort to score and interrupt.                                              | High<br><br>○ most would find doctor-patient communication important.                                | Moderate<br><br>○ not routinely collected nor embedded into the EHR but low effort to score and interrupt, and potentially could be embedded into the EHR.                            |
| Satisfaction with care<br><br>Reinhardt et al (2014), USA                                          | Quality of Care                                                                                         | 1                 | <5 minutes             | NS              | NS                          | No                           | Low<br><br>○ simple to score, simple to interpret, commonly collected data.                                                                             | High<br><br>○ most would find satisfaction with care important                                       | High<br><br>○ simple to score, simple to interpret, commonly collected data.                                                                                                          |

| <b>Name of Outcome Measure (First Author et al (year))</b>                                                                            | <b>ACP Outcome Domain</b><br>Categories:<br>Process, Action.<br>Quality of Care, or healthcare outcomes | <b># of Items</b> | <b>Completion Time</b> | <b>Literacy</b> | <b>Cost &amp; Copyright</b> | <b>Validated (yes or no)</b> | <b>Data Capture Burden Scoring, Interpretation, &amp; Extraction (e.g., EHR data or routinely collected data)</b><br>Categories:<br>Low, Moderate, High | <b>How likely is the outcome to be relevant to Stakeholders?</b><br>Categories:<br>Low, Medium, High | <b>Summary of the Pragmatic Characteristics of the outcome measure</b><br>Categories:<br>Low, Moderate, High                                               |
|---------------------------------------------------------------------------------------------------------------------------------------|---------------------------------------------------------------------------------------------------------|-------------------|------------------------|-----------------|-----------------------------|------------------------------|---------------------------------------------------------------------------------------------------------------------------------------------------------|------------------------------------------------------------------------------------------------------|------------------------------------------------------------------------------------------------------------------------------------------------------------|
| Satisfaction with Care at End-of-Life in Dementia Scale (SWC-EOLD)<br><br>Reinhardt et al (2014), USA<br>Agar et al (2017), Australia | Quality of Care                                                                                         | 14                | NS                     | NS              | NS                          | Yes                          | High<br><br>○ requires assessment by proxy, not routinely collected nor embedded in the EHR                                                             | High<br><br>○ most would find satisfaction with care important                                       | Low,<br><br>○ requires assessment by proxy, not routinely collected nor embedded in the EHR                                                                |
| Satisfaction with Life Scale<br><br>Reinhardt et al (2014), USA                                                                       | Quality of Care                                                                                         | 5                 | NS                     | NS              | Copyright but no cost       | Yes                          | High<br><br>○ requires assessment by proxy, not routinely collected nor embedded in the EHR                                                             | High<br><br>○ most would find satisfaction with life important                                       | Low<br><br>○ requires assessment by proxy, not routinely collected nor embedded in the EHR                                                                 |
| Treatment consistent with wishes (ACP problem score)<br><br>Hanson et al (2017), USA                                                  | Quality of Care                                                                                         | 3                 | NS                     | NS              | Copyright but no cost       | Yes                          | Moderate<br><br>○ not routinely collected nor embedded into the EHR but low effort to score and interrupt.                                              | High<br><br>○ most would find treatment consistent with wish important.                              | Moderate<br><br>○ not routinely collected nor embedded into the EHR but low effort to score and interrupt, and potentially could be embedded into the EHR. |

| <b>Name of Outcome Measure (First Author et al (year))</b>            | <b>ACP Outcome Domain</b><br>Categories:<br>Process,<br>Action.<br>Quality of<br>Care, or<br>healthcare<br>outcomes | <b># of Items</b> | <b>Completion Time</b> | <b>Literacy</b> | <b>Cost &amp; Copyright</b> | <b>Validated (yes or no)</b> | <b>Data Capture Burden Scoring, Interpretation, &amp; Extraction (e.g., EHR data or routinely collected data)</b><br>Categories:<br>Low, Moderate, High | <b>How likely is the outcome to be relevant to Stakeholders?</b><br>Categories:<br>Low, Medium, High | <b>Summary of the Pragmatic Characteristics of the outcome measure</b><br>Categories:<br>Low, Moderate, High                                               |
|-----------------------------------------------------------------------|---------------------------------------------------------------------------------------------------------------------|-------------------|------------------------|-----------------|-----------------------------|------------------------------|---------------------------------------------------------------------------------------------------------------------------------------------------------|------------------------------------------------------------------------------------------------------|------------------------------------------------------------------------------------------------------------------------------------------------------------|
| Dyad congruence<br><br>Song et al (2019),<br>USA                      | Quality of Care                                                                                                     | 2 scenarios       | NS                     | NS              | NS                          | No                           | High<br><br>○ significant data capture burden, no routinely collected nor embedded into the EHR                                                         | High<br><br>○ most would find congruence important.                                                  | Low<br><br>○ significant data capture burden, no routinely collected nor embedded into the EHR                                                             |
| Surrogate decision-making confidence<br><br>Song et al (2019),<br>USA | Quality of Care                                                                                                     | 5                 | NS                     | NS              | NS                          | Yes                          | Moderate<br><br>○ not routinely collected nor embedded into the EHR but low effort to score and interrupt.                                              | High<br><br>○ most would find decision making confidence important.                                  | Low<br><br>○ not routinely collected nor embedded into the EHR and requires proxy assessment.                                                              |
| <b>Process: 5 outcomes</b>                                            |                                                                                                                     |                   |                        |                 |                             |                              |                                                                                                                                                         |                                                                                                      |                                                                                                                                                            |
| Intention to write a care plan<br>Bonner et al (2021),<br>USA         | Process                                                                                                             | 3                 | NS                     | NS              | NS                          | No                           | Moderate<br><br>○ not routinely collected nor embedded into the EHR but low effort to score and interrupt.                                              | Medium<br><br>○ some might find intention to write an care plan important.                           | Moderate<br><br>○ not routinely collected nor embedded into the EHR but low effort to score and interrupt, and potentially could be embedded into the EHR. |
| Knowledge of Dementia Scale<br><br>Bonner et al (2021),<br>USA        | Process                                                                                                             | 17                | NS                     | NS              | NS                          | Yes                          | High<br><br>○ significant data capture burden, no routinely collected nor                                                                               | Medium<br><br>○ some might find knowledge of dementia important.                                     | Low<br><br>○ significant data capture burden, no routinely collected nor embedded into the EHR                                                             |

| <b>Name of Outcome Measure (First Author et al (year))</b>                                           | <b>ACP Outcome Domain</b><br>Categories:<br>Process,<br>Action.<br>Quality of<br>Care, or<br>healthcare<br>outcomes | <b># of Items</b> | <b>Completion Time</b> | <b>Literacy</b> | <b>Cost &amp; Copyright</b> | <b>Validated (yes or no)</b> | <b>Data Capture Burden Scoring, Interpretation, &amp; Extraction (e.g., EHR data or routinely collected data)</b><br>Categories:<br>Low, Moderate, High | <b>How likely is the outcome to be relevant to Stakeholders?</b><br>Categories:<br>Low, Medium, High | <b>Summary of the Pragmatic Characteristics of the outcome measure</b><br>Categories:<br>Low, Moderate, High |
|------------------------------------------------------------------------------------------------------|---------------------------------------------------------------------------------------------------------------------|-------------------|------------------------|-----------------|-----------------------------|------------------------------|---------------------------------------------------------------------------------------------------------------------------------------------------------|------------------------------------------------------------------------------------------------------|--------------------------------------------------------------------------------------------------------------|
|                                                                                                      |                                                                                                                     |                   |                        |                 |                             |                              | embedded into the EHR                                                                                                                                   |                                                                                                      |                                                                                                              |
| Knowledge Construct of the Palliative Care Survey<br><br>Van den Block et al (2020), Belgium         | Process                                                                                                             | 18                | <30 minutes            | NS              | NS                          | Yes                          | High<br><br>○ significant data capture burden, no routinely collected nor embedded into the EHR                                                         | Low<br><br>○ most would not find knowledge of PC important.                                          | Low<br><br>○ significant data capture burden, no routinely collected nor embedded into the EHR               |
| Patient Activation Measure<br><br>Overbeek et al (2018), Netherlands                                 | Process                                                                                                             | 13                | NS                     | NS              | Copyright and Cost required | Yes                          | High<br><br>○ significant data capture burden, no routinely collected nor embedded into the EHR                                                         | Low<br><br>○ most would not find activation important.                                               | Low<br><br>○ significant data capture burden, no routinely collected nor embedded into the EHR               |
| Self-efficacy (Confidence in Treatment Decisions Made questionnaire)<br><br>Bonner et al (2021), USA | Process                                                                                                             | 12                | NS                     | NS              | NS                          | Yes                          | High,<br><br>○ significant data capture burden, no routinely collected nor embedded into the EHR                                                        | Medium<br><br>○ some might find confidence important.                                                | Low<br><br>○ significant data capture burden, no routinely collected nor embedded into the EHR               |

\* Note. NS= Not Specified (meaning article/reference did not specify), greyed out= not applicable, EHR=electronic health record, PLCI=Person living with cognitive impairment, CPR=Cardiopulmonary resuscitation, MV=mechanical ventilation, TF= Tube Feeding, PC=palliative care



Secondary Outcome Measures (N=64)

| Name of Outcome Measure<br>(First Author et al (year))                                                                                                            | ACP Outcome Domain<br>Categories:<br>Process,<br>Action.<br>Quality of<br>Care, or<br>healthcare<br>outcomes | # of Items | Completion Time | Literacy | Cost & Copyright | Validated (yes or no) | Data Capture Burden Scoring, Interpretation, & Extraction (e.g., EHR data or routinely collected data)<br>Categories:<br>Low, Moderate, High | How likely is the outcome to be relevant to Stakeholders?<br>Categories:<br>Low, Medium, High | Summary of the Pragmatic Quality of the outcome measure<br>Categories:<br>Low, Moderate, High                                                                             |
|-------------------------------------------------------------------------------------------------------------------------------------------------------------------|--------------------------------------------------------------------------------------------------------------|------------|-----------------|----------|------------------|-----------------------|----------------------------------------------------------------------------------------------------------------------------------------------|-----------------------------------------------------------------------------------------------|---------------------------------------------------------------------------------------------------------------------------------------------------------------------------|
| <b>Action: 10 outcome measures</b>                                                                                                                                |                                                                                                              |            |                 |          |                  |                       |                                                                                                                                              |                                                                                               |                                                                                                                                                                           |
| ACP Forms (AD/Living will, MOLST/POLST) Completion Rates<br><br>Gabbard et al (2021), USA<br>Overbeek et al (2018), the Netherlands<br>Mitchell et al (2018), USA | Action                                                                                                       | 1          | NS              |          |                  |                       | Moderate<br><br>○ many EHRs have embedded ways to extraction upload rates of ACP forms, not always routinely collected.                      | High<br><br>○ most likely feel ACP forms are important                                        | Moderate<br><br>○ many EHRs have embedded ways to extraction upload rates of ACP forms; If not, then would have require manual chart review which would not be pragmatic. |
| Documentation of Surrogate Decision Maker<br><br>Gabbard et al (2021), USA<br>Overbeek et al (2018), the Netherlands<br>Sævareid et al (2019), Norway             | Action                                                                                                       | 1          | NS              |          |                  |                       | Low<br><br>○ often embedded into the EHRs and can easily to extract, no survey burden.                                                       | High<br><br>○ most likely feel knowing surrogate information is important                     | High<br><br>○ often embedded into the EHRs and can easily to extract, no survey burden.                                                                                   |

| Name of Outcome Measure (First Author et al (year))                                                                                                                                                                              | ACP Outcome Domain<br>Categories:<br>Process, Action.<br>Quality of Care, or healthcare outcomes | # of Items | Completion Time | Literacy | Cost & Copyright | Validated (yes or no) | Data Capture Burden Scoring, Interpretation, & Extraction (e.g., EHR data or routinely collected data)<br>Categories:<br>Low, Moderate, High | How likely is the outcome to be relevant to Stakeholders?<br>Categories:<br>Low, Medium, High | Summary of the Pragmatic Quality of the outcome measure<br>Categories:<br>Low, Moderate, High                                                              |
|----------------------------------------------------------------------------------------------------------------------------------------------------------------------------------------------------------------------------------|--------------------------------------------------------------------------------------------------|------------|-----------------|----------|------------------|-----------------------|----------------------------------------------------------------------------------------------------------------------------------------------|-----------------------------------------------------------------------------------------------|------------------------------------------------------------------------------------------------------------------------------------------------------------|
| Documentation of Preferences for Life Sustaining treatments (CPR, MV, IVF, antibiotics, and/or TFs) and Hospitalization<br><br>Reinhardt et al (2014), USA<br>Sævareid et al (2019), Norway<br>Loizeau et al (2019), Switzerland | Action                                                                                           | 1          | NS              |          |                  | No                    | Low-High<br><br>○ depending if a standardized EHR tool is utilized or not, if not, then burden is high requiring manual chart review.        | High<br><br>○ most report wanting to discuss ACP.                                             | Potentially High<br><br>○ if standardized EHR embedded tool is utilized. If not, then would have require manual chart review which would not be pragmatic. |
| Documentation of Preferences for Comfort<br><br>Mitchell et al (2018), USA                                                                                                                                                       | Action                                                                                           | 1          | NS              |          |                  | No                    | Low-High<br><br>○ depending if a standardized EHR tool is utilized or not, if not, then burden is high requiring manual chart review.        | High<br><br>○ most report wanting to discuss ACP.                                             | Potentially High<br><br>○ if standardized EHR embedded tool is utilized. If not, then would have require manual chart review which would not be pragmatic. |

| Name of Outcome Measure (First Author et al (year))                                                 | ACP Outcome Domain<br>Categories:<br>Process, Action.<br>Quality of Care, or healthcare outcomes | # of Items | Completion Time | Literacy | Cost & Copyright | Validated (yes or no) | Data Capture Burden Scoring, Interpretation, & Extraction (e.g., EHR data or routinely collected data)<br>Categories:<br>Low, Moderate, High | How likely is the outcome to be relevant to Stakeholders?<br>Categories:<br>Low, Medium, High                                | Summary of the Pragmatic Quality of the outcome measure<br>Categories:<br>Low, Moderate, High                                                               |
|-----------------------------------------------------------------------------------------------------|--------------------------------------------------------------------------------------------------|------------|-----------------|----------|------------------|-----------------------|----------------------------------------------------------------------------------------------------------------------------------------------|------------------------------------------------------------------------------------------------------------------------------|-------------------------------------------------------------------------------------------------------------------------------------------------------------|
| ACP conversation & documentation<br><br>Mitchell et al (2018), USA<br>Sævareid et al (2019), Norway | Action                                                                                           | 1          | NS              |          |                  |                       | Low-High<br><br>○ depending if a standardized EHR tool is utilized or not, if not, then burden is high requiring manual chart review.        | High<br><br>○ most report wanting to discuss ACP.                                                                            | Potentially High<br><br>○ if standardized EHR embedded tool is utilized. If not, then would have require manual chart review which would not be pragmatic.  |
| Use of ACP billing codes<br><br>Gabbard et al (2021), USA                                           | Action                                                                                           | 1          | NS              |          |                  |                       | Low<br><br>○ embedded into the EHR, easy to extract, no survey burden                                                                        | Low<br><br>○ most are unlikely to believe that the outcomes is useful                                                        | High<br><br>○ embedded into the EHR, easy to extract, no survey burden                                                                                      |
| Palliative Care Treatment Plan Domain score<br><br>Hanson et al (2017), USA                         | Action                                                                                           | 10         | NS              | NS       | NS               | Yes                   | High<br><br>○ requires manual chart review to assess if 10 ACP components were covered & documented                                          | Medium<br><br>○ many would think important to cover these 10 ACP components but often would not care about the actual score. | Low<br><br>○ requires manual chart review, High Extraction Burden<br>Requires high amount of effort to score, not commonly embedded into clinical practice. |

| <b>Name of Outcome Measure (First Author et al (year))</b>                                    | <b>ACP Outcome Domain</b><br>Categories:<br>Process,<br>Action.<br>Quality of<br>Care, or<br>healthcare<br>outcomes | <b># of Items</b> | <b>Completion Time</b> | <b>Literacy</b> | <b>Cost &amp; Copyright</b> | <b>Validated (yes or no)</b> | <b>Data Capture Burden Scoring, Interpretation, &amp; Extraction (e.g., EHR data or routinely collected data)</b><br>Categories:<br>Low, Moderate, High | <b>How likely is the outcome to be relevant to Stakeholders?</b><br>Categories:<br>Low, Medium, High           | <b>Summary of the Pragmatic Quality of the outcome measure</b><br>Categories:<br>Low, Moderate, High                                                       |
|-----------------------------------------------------------------------------------------------|---------------------------------------------------------------------------------------------------------------------|-------------------|------------------------|-----------------|-----------------------------|------------------------------|---------------------------------------------------------------------------------------------------------------------------------------------------------|----------------------------------------------------------------------------------------------------------------|------------------------------------------------------------------------------------------------------------------------------------------------------------|
| Number of medical preferences discussed<br><br>Tilburgs et al (2020), Netherlands             | Action                                                                                                              | 7                 | NS                     | NS              | NS                          | No                           | High<br><br>○ requires manual chart review to assess if 7 ACP components were covered & documented                                                      | Medium<br><br>○ Most would find discussion of medical preferences important but not actual score.              | Low<br><br>○ requires manual chart review, High Extraction Burden. Requires high amount of effort to score, not commonly embedded into clinical practice.  |
| Number of non-medical preferences discussed<br><br>Tilburgs et al (2020), Netherlands         | Action                                                                                                              | 7                 | NS                     | NS              | NS                          | No                           | High<br><br>○ requires manual chart review to assess if 7 ACP components were covered & documented                                                      | Medium<br><br>○ Most would find discussion of these important but often would not care about the actual score. | Low<br><br>○ requires manual chart review, High Extraction Burden. Requires high amount of effort to score, not commonly embedded into clinical practice.  |
| Percentage of patients who reported having feeding discussions<br><br>Hanson et al (2011), US | Action                                                                                                              | 1                 | NS                     |                 |                             | No                           | Low-High<br><br>○ depending if a standardized EHR tool is utilized or not, if not, then burden is high requiring manual chart review.                   | Medium<br><br>○ Some would feel important to discuss goals around feeding but not %.                           | Potentially High<br><br>○ if standardized EHR embedded tool is utilized. If not, then would have require manual chart review which would not be pragmatic. |

| Name of Outcome Measure (First Author et al (year))                                                                                                        | ACP Outcome Domain<br>Categories:<br>Process, Action.<br>Quality of Care, or healthcare outcomes | # of Items | Completion Time | Literacy | Cost & Copyright | Validated (yes or no) | Data Capture Burden Scoring, Interpretation, & Extraction (e.g., EHR data or routinely collected data)<br>Categories:<br>Low, Moderate, High | How likely is the outcome to be relevant to Stakeholders?<br>Categories:<br>Low, Medium, High | Summary of the Pragmatic Quality of the outcome measure<br>Categories:<br>Low, Moderate, High                        |
|------------------------------------------------------------------------------------------------------------------------------------------------------------|--------------------------------------------------------------------------------------------------|------------|-----------------|----------|------------------|-----------------------|----------------------------------------------------------------------------------------------------------------------------------------------|-----------------------------------------------------------------------------------------------|----------------------------------------------------------------------------------------------------------------------|
| <b>Healthcare: 31 Outcomes</b>                                                                                                                             |                                                                                                  |            |                 |          |                  |                       |                                                                                                                                              |                                                                                               |                                                                                                                      |
| Rates of burdensome treatment<br><br>Mitchell et al (2020), USA<br>Mitchell et al (2018), USA<br>Loomer at al (2021), USA<br>Sævareid et al (2019), Norway | Health care outcomes                                                                             | 1          | NS              |          |                  |                       | Low<br><br>○ EHR data                                                                                                                        | High<br><br>○ Most would find rates of burdensome treatments important.                       | High<br><br>○ EHR data, no survey delivery burden.                                                                   |
| Rates of Hospital Transfers<br><br>Mitchell et al (2020), USA<br>Hanson et al (2017), USA                                                                  | Healthcare outcome                                                                               | NA         | NA              |          |                  |                       | Low<br><br>○ EHR data                                                                                                                        | High<br><br>○ Most would find hospital transfer important but not rates.                      | High<br><br>○ EHR data, no survey delivery burden.                                                                   |
| Rates of Hospice Enrollment<br><br>Mitchell et al (2020), USA<br>Hanson et al (2017), USA                                                                  | Healthcare outcome                                                                               | 1          | NA              |          |                  |                       | Low<br><br>○ routinely collected and embedded into the EHR                                                                                   | Medium<br><br>○ Many would find hospice enrollment important but not rates.                   | Potentially High<br><br>○ Embedded in some EHR data, though some EHRs only have referral rates not enrollment rates. |

| Name of Outcome Measure (First Author et al (year))                                                                                                                                                  | ACP Outcome Domain<br>Categories:<br>Process, Action.<br>Quality of Care, or healthcare outcomes | # of Items | Completion Time | Literacy | Cost & Copyright      | Validated (yes or no) | Data Capture Burden Scoring, Interpretation, & Extraction (e.g., EHR data or routinely collected data)<br>Categories:<br>Low, Moderate, High | How likely is the outcome to be relevant to Stakeholders?<br>Categories:<br>Low, Medium, High | Summary of the Pragmatic Quality of the outcome measure<br>Categories:<br>Low, Moderate, High                   |
|------------------------------------------------------------------------------------------------------------------------------------------------------------------------------------------------------|--------------------------------------------------------------------------------------------------|------------|-----------------|----------|-----------------------|-----------------------|----------------------------------------------------------------------------------------------------------------------------------------------|-----------------------------------------------------------------------------------------------|-----------------------------------------------------------------------------------------------------------------|
| Rates of Hospitalization and ED visits<br><br>Loomer et al (2021), USA<br>Martin et al (2019), Australia<br>Brazil et al (2018), UK<br>Lamppu et al (2021), Finland<br>Sævareid et al (2019), Norway | Healthcare outcome                                                                               | 1          | NS              |          |                       |                       | Low<br><br>○ requires small amount of effort to extract from the EHR, routinely measured.                                                    | High<br><br>○ many would find rates of ED/hospitalizations important.                         | High<br><br>○ Routinely collected, requires minimal effort to extract from the EHR, no survey delivery burden.  |
| Quality of life Scale Questionnaire (EuroQol 5D)<br><br>Tilburgs et al (2020), Netherlands<br>Sampson et al (2011), London, UK                                                                       | Health care outcomes                                                                             | 15         | NS              | NS       | Copyright but no cost | Yes                   | High<br><br>○ requires self-assessment or assessment by proxy, not routinely collected nor embedded in the EHR                               | High<br><br>○ most would find quality of life important                                       | Low<br><br>○ high data capture burden, not routinely collected, and could be challenging to embed into the EHR. |
| Hospital-Length of stay<br><br>Martin et al (2019), Australia                                                                                                                                        | Health care outcomes                                                                             | NA         | NS              |          |                       |                       | Low<br><br>○ requires small amount of effort to extract from the EHR, routinely measured.                                                    | High<br><br>○ Most would find how long they are in the hospital important.                    | High<br><br>○ Routinely collected, requires minimal effort to extract from the EHR, no survey delivery burden.  |

| Name of Outcome Measure (First Author et al (year))                                                                         | ACP Outcome Domain<br>Categories:<br>Process, Action.<br>Quality of Care, or healthcare outcomes | # of Items | Completion Time | Literacy | Cost & Copyright      | Validated (yes or no) | Data Capture Burden Scoring, Interpretation, & Extraction (e.g., EHR data or routinely collected data)<br>Categories:<br>Low, Moderate, High          | How likely is the outcome to be relevant to Stakeholders?<br>Categories:<br>Low, Medium, High | Summary of the Pragmatic Quality of the outcome measure<br>Categories:<br>Low, Moderate, High                   |
|-----------------------------------------------------------------------------------------------------------------------------|--------------------------------------------------------------------------------------------------|------------|-----------------|----------|-----------------------|-----------------------|-------------------------------------------------------------------------------------------------------------------------------------------------------|-----------------------------------------------------------------------------------------------|-----------------------------------------------------------------------------------------------------------------|
| Symptom Management at the End of Life in Dementia (SM-EOLD)<br><br>Agar et al (2017), Australia<br>Hanson et al (2017), USA | Health care outcomes                                                                             | 9          | NS              | NS       | NS                    | Yes                   | High<br><br>○ requires assessment by proxy, not routinely collected nor embedded in the EHR                                                           | High<br><br>○ most would find symptom management important.                                   | Low<br><br>○ requires assessment by proxy, not routinely collected nor embedded in the EHR                      |
| Comfort Assessment in Dying with Dementia (CAD-EOLD)<br><br>Agar et al (2017), Australia                                    | Healthcare outcome                                                                               | 14         | NS              | NS       | NS                    | Yes                   | High<br><br>○ requires proxies to self-report 14 items about comfort, not routinely collected nor embedded in the EHR                                 | High<br><br>○ most would find quality of life important                                       | Low<br><br>○ high data capture burden, not routinely collected, and could be challenging to embed into the EHR. |
| Dementia Quality of Life (DEMQOL) questionnaire<br><br>Tilburgs et al (2020), Netherlands                                   | Health care outcomes                                                                             | 28         | NS              | NS       | Copyright but no cost | Yes                   | High<br><br>○ Requires skilled nursing staff to observe the patient for a week and score the patient, not routinely collected nor embedded in the EHR | High<br><br>○ most would find quality of life important                                       | Low<br><br>○ high data capture burden, not routinely collected, and could be challenging to embed into the EHR. |

| <b>Name of Outcome Measure (First Author et al (year))</b>                   | <b>ACP Outcome Domain</b><br>Categories:<br>Process, Action.<br>Quality of Care, or healthcare outcomes | <b># of Items</b> | <b>Completion Time</b> | <b>Literacy</b> | <b>Cost &amp; Copyright</b> | <b>Validated (yes or no)</b> | <b>Data Capture Burden Scoring, Interpretation, &amp; Extraction (e.g., EHR data or routinely collected data)</b><br>Categories:<br>Low, Moderate, High | <b>How likely is the outcome to be relevant to Stakeholders?</b><br>Categories:<br>Low, Medium, High                     | <b>Summary of the Pragmatic Quality of the outcome measure</b><br>Categories:<br>Low, Moderate, High            |
|------------------------------------------------------------------------------|---------------------------------------------------------------------------------------------------------|-------------------|------------------------|-----------------|-----------------------------|------------------------------|---------------------------------------------------------------------------------------------------------------------------------------------------------|--------------------------------------------------------------------------------------------------------------------------|-----------------------------------------------------------------------------------------------------------------|
| Dementia Quality of Life Instrument(DQOL)<br><br>Whitlatch et al (2019), USA | Health care outcomes                                                                                    | 15                | NS                     | NS              | NS                          | Yes                          | High<br><br>○ requires proxies to self-report 14 items about comfort, not routinely collected nor embedded in the EHR                                   | High<br><br>○ most would find quality of life important                                                                  | Low<br><br>○ high data capture burden, not routinely collected, and could be challenging to embed into the EHR. |
| DNR orders<br><br>Brazil et al (2018), UK                                    | Healthcare outcome                                                                                      | 1                 | NA                     |                 |                             |                              | Low<br><br>○ routinely collected and embedded into the EHR                                                                                              | Medium<br><br>○ most if they wished to be DNR would want to make sure the medical team knows but not the rate of orders. | High<br><br>○ routinely collected and embedded into the EHR, no survey delivery burden                          |
| Feeding tube placement<br><br>Hanson et al (2011), USA                       | Healthcare outcome                                                                                      | 1                 | NA                     |                 |                             |                              | Low<br><br>○ routinely collected and embedded into the EHR                                                                                              | Medium<br><br>○ some would find FT placement important.                                                                  | High<br><br>○ routinely collected and embedded into the EHR, no survey delivery burden                          |



| Name of Outcome Measure (First Author et al (year))                                                                            | ACP Outcome Domain<br>Categories:<br>Process, Action. Quality of Care, or healthcare outcomes | # of Items | Completion Time | Literacy | Cost & Copyright | Validated (yes or no) | Data Capture Burden Scoring, Interpretation, & Extraction (e.g., EHR data or routinely collected data)<br>Categories:<br>Low, Moderate, High                   | How likely is the outcome to be relevant to Stakeholders?<br>Categories:<br>Low, Medium, High | Summary of the Pragmatic Quality of the outcome measure<br>Categories:<br>Low, Moderate, High                   |
|--------------------------------------------------------------------------------------------------------------------------------|-----------------------------------------------------------------------------------------------|------------|-----------------|----------|------------------|-----------------------|----------------------------------------------------------------------------------------------------------------------------------------------------------------|-----------------------------------------------------------------------------------------------|-----------------------------------------------------------------------------------------------------------------|
| General Health Questionnaire(GHQ)<br><br>Brazil et al (2018), UK                                                               | Healthcare outcome                                                                            | 12         | NS              |          |                  |                       | High<br><br>○ requires proxies to self-report 12 items about general health, not routinely collected nor embedded in the EHR                                   | High<br><br>○ most would find mental health important                                         | Low<br><br>○ high data capture burden, not routinely collected, and could be challenging to embed into the EHR. |
| Cost of Caring for PLCI (using Resource Utilization in Dementia questionnaire (RUD))<br><br>Tilburgs et al (2020), Netherlands | Healthcare outcome                                                                            | 34         | NS              | NS       | NS               | Yes                   | High<br><br>○ requires proxies to self-report 34 items about cost of providing care to patients with dementia, not routinely collected nor embedded in the EHR | High<br><br>○ most would find cost important                                                  | Low<br><br>○ high data capture burden, not routinely collected, and could be challenging to embed into the EHR. |

| <b>Name of Outcome Measure (First Author et al (year))</b>            | <b>ACP Outcome Domain</b><br>Categories:<br>Process, Action.<br>Quality of Care, or healthcare outcomes | <b># of Items</b> | <b>Completion Time</b> | <b>Literacy</b> | <b>Cost &amp; Copyright</b> | <b>Validated (yes or no)</b> | <b>Data Capture Burden Scoring, Interpretation, &amp; Extraction (e.g., EHR data or routinely collected data)</b><br>Categories:<br>Low, Moderate, High | <b>How likely is the outcome to be relevant to Stakeholders?</b><br>Categories:<br>Low, Medium, High | <b>Summary of the Pragmatic Quality of the outcome measure</b><br>Categories:<br>Low, Moderate, High                      |
|-----------------------------------------------------------------------|---------------------------------------------------------------------------------------------------------|-------------------|------------------------|-----------------|-----------------------------|------------------------------|---------------------------------------------------------------------------------------------------------------------------------------------------------|------------------------------------------------------------------------------------------------------|---------------------------------------------------------------------------------------------------------------------------|
| Healthcare Cost<br><br>Lamppu et al (2021), Finland                   | Healthcare outcome                                                                                      | NA                | NS                     |                 |                             |                              | Moderate<br><br>○ collected routinely in the EHR but often requires moderate amount of effort to extract from the EHR and interrupt.                    | High<br><br>○ most would find healthcare cost important                                              | Moderate<br><br>○ routinely collected in the EHR, no survey delivery burden, but can be labor intensive to analysis data. |
| Index for Managing Memory Loss<br><br>Hilgeman et al (2014), USA      | Healthcare outcome                                                                                      | 42                | NS                     | NS              | NS                          | No                           | High<br><br>○ requires proxies to self-report 43 items related to caregiver coping strategies, not routinely collected nor embedded in the EHR          | Medium<br><br>○ some would feel coping strategies are important.                                     | Low<br><br>○ high data capture burden, not routinely collected, and could be challenging to embed into the EHR.           |
| Kessler Distress Scale (KD10)<br><br>Sampson et al (2011), London, UK | Healthcare outcome                                                                                      | 10                | <10 minutes            | NS              | Copyright but no cost       | Yes                          | High<br><br>○ requires proxies to self-report about distress using 10 item tool, not routinely collected data in EHR and would be hard to embed in EHR  | High<br><br>○ most would find caregiver distress is important                                        | Low<br><br>○ high data capture burden, not routinely collected, and could be challenging to embed into the EHR.           |

| Name of Outcome Measure (First Author et al (year))                                                                        | ACP Outcome Domain<br>Categories:<br>Process, Action.<br>Quality of Care, or healthcare outcomes | # of Items   | Completion Time | Literacy | Cost & Copyright | Validated (yes or no) | Data Capture Burden Scoring, Interpretation, & Extraction (e.g., EHR data or routinely collected data)<br>Categories:<br>Low, Moderate, High                                                                                                                    | How likely is the outcome to be relevant to Stakeholders?<br>Categories:<br>Low, Medium, High | Summary of the Pragmatic Quality of the outcome measure<br>Categories:<br>Low, Moderate, High                                                                                           |
|----------------------------------------------------------------------------------------------------------------------------|--------------------------------------------------------------------------------------------------|--------------|-----------------|----------|------------------|-----------------------|-----------------------------------------------------------------------------------------------------------------------------------------------------------------------------------------------------------------------------------------------------------------|-----------------------------------------------------------------------------------------------|-----------------------------------------------------------------------------------------------------------------------------------------------------------------------------------------|
| Medical care use (hospital care, diagnostic procedures, & medical interventions)<br><br>Overbeek et al (2018), Netherlands | Healthcare outcome                                                                               | NA           | NS              |          |                  |                       | Low<br><br>○ routinely collected and embedded into the EHR                                                                                                                                                                                                      | High<br><br>○ many would find use of medical care important                                   | High<br><br>○ routinely collected and embedded into the EHR, no survey delivery burden                                                                                                  |
| Medication assessment<br><br>Husebø et al (2019), USA                                                                      | Healthcare outcome                                                                               | 3 components | NS              | NS       | NS               | No                    | High<br><br>○ high scoring burden, high burden interpret, consisting of 3 component 1) measuring the total number of medications and doses of medications, 2) any drug-related problems, and 3) any drug-drug interactions. Not routinely collected data in EHR | Medium<br><br>○ many would feel medications are important                                     | Low<br><br>○ High capture burden, total number and dose of medications is routinely collected but drug-related problems and drug-drug interactions would be harder to embed in the EHR. |

| <b>Name of Outcome Measure (First Author et al (year))</b>                                                              | <b>ACP Outcome Domain</b><br>Categories:<br>Process, Action.<br>Quality of Care, or healthcare outcomes | <b># of Items</b> | <b>Completion Time</b> | <b>Literacy</b> | <b>Cost &amp; Copyright</b> | <b>Validated (yes or no)</b> | <b>Data Capture Burden Scoring, Interpretation, &amp; Extraction (e.g., EHR data or routinely collected data)</b><br>Categories:<br>Low, Moderate, High                        | <b>How likely is the outcome to be relevant to Stakeholders?</b><br>Categories:<br>Low, Medium, High | <b>Summary of the Pragmatic Quality of the outcome measure</b><br>Categories:<br>Low, Moderate, High                               |
|-------------------------------------------------------------------------------------------------------------------------|---------------------------------------------------------------------------------------------------------|-------------------|------------------------|-----------------|-----------------------------|------------------------------|--------------------------------------------------------------------------------------------------------------------------------------------------------------------------------|------------------------------------------------------------------------------------------------------|------------------------------------------------------------------------------------------------------------------------------------|
| Mobilization-Observation-Behavior-Intensity-Dementia–2 pain scale<br><br>Husebø et al (2019), USA                       | Healthcare outcome                                                                                      | 10                | NS                     | NS              | No cost, No copyright       | Yes                          | Moderate<br><br>○ requires nurse as proxy to assess 10 items, easy to score and interrupt, has potential to be embedded into the EHR                                           | High<br><br>○ most would feel pain is important                                                      | Moderate<br><br>○ requires proxy assessment by nursing, not routinely collected and embedded but has the potential to be embedded. |
| Mortality rates (in hospital and nursing home)<br><br>Martin et al (2019), Australia                                    | Healthcare outcome                                                                                      | NA                | NS                     |                 |                             |                              | Low<br><br>○ routinely collected and embedded into the EHR                                                                                                                     | Medium<br><br>○ many would find location of death important.                                         | High<br><br>○ routinely collected and embedded into the EHR, no survey delivery burden                                             |
| Neuropsychiatric Inventory–Nursing Home version including staff distress score (NPI-NH)<br><br>Husebø et al (2019), USA | Healthcare outcome                                                                                      | 82                | NS                     | NS              | No cost, No Copyright       | Yes                          | High<br><br>○ requires proxies to self-report 82 items related to Neuropsychiatric symptoms in dementia, not routinely collected data in EHR and would be hard to embed in EHR | High<br><br>○ most would find Neuropsychiatric symptoms in dementia important                        | Low<br><br>○ high data capture burden, not routinely collected, and could be challenging to embed into the EHR.                    |

| <b>Name of Outcome Measure (First Author et al (year))</b>                                           | <b>ACP Outcome Domain</b><br>Categories:<br>Process, Action.<br>Quality of Care, or healthcare outcomes | <b># of Items</b> | <b>Completion Time</b> | <b>Literacy</b> | <b>Cost &amp; Copyright</b> | <b>Validated (yes or no)</b> | <b>Data Capture Burden Scoring, Interpretation, &amp; Extraction (e.g., EHR data or routinely collected data)</b><br>Categories:<br>Low, Moderate, High | <b>How likely is the outcome to be relevant to Stakeholders?</b><br>Categories:<br>Low, Medium, High | <b>Summary of the Pragmatic Quality of the outcome measure</b><br>Categories:<br>Low, Moderate, High                                                                                               |
|------------------------------------------------------------------------------------------------------|---------------------------------------------------------------------------------------------------------|-------------------|------------------------|-----------------|-----------------------------|------------------------------|---------------------------------------------------------------------------------------------------------------------------------------------------------|------------------------------------------------------------------------------------------------------|----------------------------------------------------------------------------------------------------------------------------------------------------------------------------------------------------|
| Pain and distress<br><br>Sampson et al (2011), London, UK                                            | Healthcare outcome                                                                                      | 2                 | <10 minutes            | NS              | NS                          | No                           | Low<br><br>○ simple to score, simple to interpret, and has the potential to be embedded into the EHR                                                    | High<br><br>○ most would find pain and distress is important                                         | Moderate<br><br>○ low data capture burden and could easily be embedded into the EHR.                                                                                                               |
| Physical self-maintenance scale for activities of daily living (ADL)<br><br>Husebø et al (2019), USA | Healthcare outcome                                                                                      | 6                 | NS                     | NS              | No cost, No Copyright       | Yes                          | Moderate<br><br>○ simple to administer and interpret, could be embedded in EHR but not routinely embedded right now.                                    | High<br><br>○ most would find ADLs to be important                                                   | Moderate<br><br>○ Free, readable at the skilled nursing level, low demand on assessor training and low burden, quick to complete and easy to score, easy to interpret. Could be embedded into EHR. |
| Place of death<br><br>Brazil et al (2018), UK                                                        | Healthcare outcome                                                                                      | 1                 | NS                     |                 |                             |                              | Moderate<br><br>○ often EHR data but if one dies out of network or hospice, then location can be difficult to obtain.                                   | High<br><br>○ most find location of death important                                                  | Moderate<br><br>○ often EHR data but if one dies out of network or hospice, then location can be difficult to obtain.                                                                              |

| <b>Name of Outcome Measure (First Author et al (year))</b>                                                                 | <b>ACP Outcome Domain</b><br>Categories:<br>Process, Action.<br>Quality of Care, or healthcare outcomes | <b># of Items</b> | <b>Completion Time</b> | <b>Literacy</b> | <b>Cost &amp; Copyright</b> | <b>Validated (yes or no)</b> | <b>Data Capture Burden Scoring, Interpretation, &amp; Extraction (e.g., EHR data or routinely collected data)</b><br>Categories:<br>Low, Moderate, High | <b>How likely is the outcome to be relevant to Stakeholders?</b><br>Categories:<br>Low, Medium, High | <b>Summary of the Pragmatic Quality of the outcome measure</b><br>Categories:<br>Low, Moderate, High            |
|----------------------------------------------------------------------------------------------------------------------------|---------------------------------------------------------------------------------------------------------|-------------------|------------------------|-----------------|-----------------------------|------------------------------|---------------------------------------------------------------------------------------------------------------------------------------------------------|------------------------------------------------------------------------------------------------------|-----------------------------------------------------------------------------------------------------------------|
| Short-form health survey to measure change in quality of life (SF-12)<br><br>Overbeek et al (2018), Netherlands            | Healthcare outcome                                                                                      | 12                | <5 minutes             | NS              | Has cost and copyright      | Yes                          | High<br><br>○ requires proxies to self-report 12 items about quality of life, not routinely collected nor embedded in the EHR                           | High<br><br>○ most stakeholders would find quality of life important                                 | Low<br><br>○ high data capture burden, not routinely collected, and could be challenging to embed into the EHR. |
| State Anger Scale (SAS)-subscale of State-Trait Anger Expression Inventory (STAXI)<br><br>Sampson et al (2011), London, UK | Healthcare outcome                                                                                      | 15                | <10 minutes            | NS              | Has cost and copyright      | Yes                          | High<br><br>○ requires proxies to self-report 15 items about anger, not routinely collected nor embedded in the EHR                                     | Medium<br><br>○ many stakeholders would find anger to be important                                   | Low<br><br>○ high data capture burden, not routinely collected, and could be challenging to embed into the EHR. |
| Symptoms and care<br><br>Agar et al (2017), Australia                                                                      | Healthcare outcome                                                                                      | 3 components      | NS                     | NS              |                             | No                           | High<br><br>○ requires manual chart review in the last month of life.                                                                                   | High<br><br>○ most would find symptoms/care at end-of-life important.                                | Low<br><br>○ high data capture burden, requires manual chart review.                                            |

| <b>Name of Outcome Measure (First Author et al (year))</b>                              | <b>ACP Outcome Domain</b><br>Categories:<br>Process, Action.<br>Quality of Care, or healthcare outcomes | <b># of Items</b> | <b>Completion Time</b> | <b>Literacy</b> | <b>Cost &amp; Copyright</b> | <b>Validated (yes or no)</b> | <b>Data Capture Burden Scoring, Interpretation, &amp; Extraction (e.g., EHR data or routinely collected data)</b><br>Categories:<br>Low, Moderate, High | <b>How likely is the outcome to be relevant to Stakeholders?</b><br>Categories:<br>Low, Medium, High | <b>Summary of the Pragmatic Quality of the outcome measure</b><br>Categories:<br>Low, Moderate, High            |
|-----------------------------------------------------------------------------------------|---------------------------------------------------------------------------------------------------------|-------------------|------------------------|-----------------|-----------------------------|------------------------------|---------------------------------------------------------------------------------------------------------------------------------------------------------|------------------------------------------------------------------------------------------------------|-----------------------------------------------------------------------------------------------------------------|
| The Service Availability Measure<br><br>Whitlatch et al (2019), USA                     | Healthcare outcome                                                                                      | 14                | NS                     | NS              |                             | No                           | High<br><br>○ requires proxies to self-report 14 services (e.g. counseling, support group, respite), not routinely collected nor embedded in the EHR.   | Medium<br><br>○ some would find uses of services important                                           | Low<br><br>○ high data capture burden, not routinely collected, and could be challenging to embed into the EHR. |
| Quality of Life in Late-stage Dementia (QUALID)<br><br>Agar et al (2017), Australia     | Healthcare outcome                                                                                      | 11                | NS                     | NS              | NS                          | Yes                          | High<br><br>○ requires proxies to self-report 11 items related to quality of life, not routinely collected nor embedded in the EHR.                     | High<br><br>○ most would find quality of life important.                                             | Low<br><br>○ high data capture burden, not routinely collected, and could be challenging to embed into the EHR. |
| Quality of Dying in Long Term Care (QOD-LTC)<br><br>Van den Block et al (2020), Belgium | Healthcare outcome                                                                                      | 11                | NS                     | NS              | NS                          | Yes                          | High<br><br>○ requires proxies to assess 11 items related to quality of life for PLCI, not routinely collected nor embedded in the EHR.                 | High<br><br>○ most would quality of dying important.                                                 | Low<br><br>○ high data capture burden, not routinely collected, and could be challenging to embed into the EHR. |

| Name of Outcome Measure (First Author et al (year))             | ACP Outcome Domain<br>Categories:<br>Process, Action.<br>Quality of Care, or healthcare outcomes | # of Items | Completion Time | Literacy | Cost & Copyright | Validated (yes or no) | Data Capture Burden Scoring, Interpretation, & Extraction (e.g., EHR data or routinely collected data)<br>Categories:<br>Low, Moderate, High                                                                                                                                                 | How likely is the outcome to be relevant to Stakeholders?<br>Categories:<br>Low, Medium, High | Summary of the Pragmatic Quality of the outcome measure<br>Categories:<br>Low, Moderate, High     |
|-----------------------------------------------------------------|--------------------------------------------------------------------------------------------------|------------|-----------------|----------|------------------|-----------------------|----------------------------------------------------------------------------------------------------------------------------------------------------------------------------------------------------------------------------------------------------------------------------------------------|-----------------------------------------------------------------------------------------------|---------------------------------------------------------------------------------------------------|
| <b>Quality of Care: 17 outcome measures</b>                     |                                                                                                  |            |                 |          |                  |                       |                                                                                                                                                                                                                                                                                              |                                                                                               |                                                                                                   |
| Care concordance<br><br>Sævareid et al (2019), Norway           | Quality of Care                                                                                  | 1          | NS              |          |                  | No                    | High<br><br>○ requires manual chart review.                                                                                                                                                                                                                                                  | High<br><br>○ most would likely feel care concordance is important                            | Low<br><br>○ requires manual chart review.                                                        |
| Care-related Agreement Scale<br><br>Whitlatch et al (2019), USA | Quality of Care                                                                                  | 5          | NS              | NS       |                  | No                    | High<br><br>○ requires proxies and PLCI to report and then assess the level of agreement or disagreement in five areas: planning finances, deciding where to go, planning for care, making major decisions, and deciding about medical care; not routinely collected nor embedded in the EHR | Medium<br><br>○ many would find agreement to be important                                     | Low<br><br>○ high data capture burden, not routinely collected, and would be hard to embed in EHR |



| Name of Outcome Measure (First Author et al (year))                       | ACP Outcome Domain<br>Categories:<br>Process, Action.<br>Quality of Care, or healthcare outcomes | # of Items | Completion Time | Literacy                    | Cost & Copyright      | Validated (yes or no) | Data Capture Burden Scoring, Interpretation, & Extraction (e.g., EHR data or routinely collected data)<br>Categories:<br>Low, Moderate, High         | How likely is the outcome to be relevant to Stakeholders?<br>Categories:<br>Low, Medium, High | Summary of the Pragmatic Quality of the outcome measure<br>Categories:<br>Low, Moderate, High                                                                                                                      |
|---------------------------------------------------------------------------|--------------------------------------------------------------------------------------------------|------------|-----------------|-----------------------------|-----------------------|-----------------------|------------------------------------------------------------------------------------------------------------------------------------------------------|-----------------------------------------------------------------------------------------------|--------------------------------------------------------------------------------------------------------------------------------------------------------------------------------------------------------------------|
| CollaboRATE questionnaire score<br><br>Tilburgs et al (2020), Netherlands | Quality of Care                                                                                  | 3          | 15 minutes      | NS                          | Copyright but no cost | Yes                   | Moderate<br><br>○ requires PLCI report level of shared decision making after a clinical encounter, not routinely collected nor embedded into the EHR | Medium<br><br>○ many would feel shared decision making is important but not the actual score. | Low<br><br>○ requires self-assessment after a clinical encounter, ,not routinely collected data in EHR (and would be hard to embed in EHR                                                                          |
| Decision Conflicts Scale (DCS)<br><br>Sampson et al (2011), London, UK    | Quality of Care                                                                                  | 16         | 5-10 minutes    | Below 8 <sup>th</sup> grade | No Cost nor Copyright | Yes                   | Moderate<br><br>○ requires moderate effort to score and interpret. May be challenging to embed and extract from the electronic record.               | Medium<br><br>○ some would find perceptions of uncertainty in choosing options important      | Low<br><br>○ measured with limited training, moderate time and effort required to ask caregivers to complete, and to link responses to a specific clinical decision, challenging to embed in the electronic record |

| Name of Outcome Measure (First Author et al (year))                           | ACP Outcome Domain<br>Categories:<br>Process, Action.<br>Quality of Care, or healthcare outcomes | # of Items | Completion Time | Literacy | Cost & Copyright      | Validated (yes or no) | Data Capture Burden Scoring, Interpretation, & Extraction (e.g., EHR data or routinely collected data)<br>Categories:<br>Low, Moderate, High | How likely is the outcome to be relevant to Stakeholders?<br>Categories:<br>Low, Medium, High | Summary of the Pragmatic Quality of the outcome measure<br>Categories:<br>Low, Moderate, High                                                                                                                      |
|-------------------------------------------------------------------------------|--------------------------------------------------------------------------------------------------|------------|-----------------|----------|-----------------------|-----------------------|----------------------------------------------------------------------------------------------------------------------------------------------|-----------------------------------------------------------------------------------------------|--------------------------------------------------------------------------------------------------------------------------------------------------------------------------------------------------------------------|
| Decision Satisfaction Inventory (DSI)<br><br>Sampson et al (2011), London, UK | Quality of Care                                                                                  | 15         | <5 minutes      | NS       | NS                    | Yes                   | Moderate<br><br>○ requires moderate effort to score and interpret. May be challenging to embed and extract from the electronic record.       | Medium<br><br>○ some would find quality of the decision-making process important.             | Low<br><br>○ measured with limited training, moderate time and effort required to ask caregivers to complete, and to link responses to a specific clinical decision, challenging to embed in the electronic record |
| Decisional Regret Index<br><br>Hanson et al (2011), USA                       | Quality of Care                                                                                  | 5          | <5 minutes      | NS       | Copyright but no cost | Yes                   | Moderate<br><br>○ requires moderate effort to score and interpret. May be challenging to embed and extract from the electronic record.       | Medium<br><br>○ some would find decision making regret important.                             | Low<br><br>○ measured with limited training, moderate time and effort required to ask caregivers to complete, and to link responses to a specific clinical decision, challenging to embed in the electronic record |

| Name of Outcome Measure (First Author et al (year))                                                                                                                  | ACP Outcome Domain<br>Categories:<br>Process, Action.<br>Quality of Care, or healthcare outcomes | # of Items | Completion Time | Literacy | Cost & Copyright      | Validated (yes or no) | Data Capture Burden Scoring, Interpretation, & Extraction (e.g., EHR data or routinely collected data)<br>Categories:<br>Low, Moderate, High                  | How likely is the outcome to be relevant to Stakeholders?<br>Categories:<br>Low, Medium, High | Summary of the Pragmatic Quality of the outcome measure<br>Categories:<br>Low, Moderate, High                                                                                                                      |
|----------------------------------------------------------------------------------------------------------------------------------------------------------------------|--------------------------------------------------------------------------------------------------|------------|-----------------|----------|-----------------------|-----------------------|---------------------------------------------------------------------------------------------------------------------------------------------------------------|-----------------------------------------------------------------------------------------------|--------------------------------------------------------------------------------------------------------------------------------------------------------------------------------------------------------------------|
| Dyadic Relationship Scale<br><br>Whitlatch et al (2019), USA                                                                                                         | Quality of Care                                                                                  | 15         | NS              | NS       | Copyright but no cost | Yes                   | Moderate<br><br>○ requires moderate effort to score and interpret. May be challenging to embed and extract from the electronic record.                        | Medium<br><br>○ many would find having a positive dyadic interaction important.               | Low<br><br>○ measured with limited training, moderate time and effort required to ask caregivers to complete, and to link responses to a specific clinical decision, challenging to embed in the electronic record |
| End-of-Life in Dementia-Satisfaction with Care (EOLD-SWC)<br><br>Hanson et al (2017), USA<br>Sampson et al (2011), London, UK<br>Van den Block et al (2020), Belgium | Quality of Care                                                                                  | 15         | NS              | NS       | NS                    | Yes                   | High<br><br>○ not routinely assessed in routine clinical care, requires observation over three months, but is relatively quick and easy to fill out and score | High<br><br>○ most would feel end of life care is important                                   | Low<br><br>○ requires proxy assessment, not routinely assessed in clinical practice, would be challenging to embed in the EHR                                                                                      |

| <b>Name of Outcome Measure (First Author et al (year))</b>                                                              | <b>ACP Outcome Domain</b><br>Categories:<br>Process, Action.<br>Quality of Care, or healthcare outcomes | <b># of Items</b> | <b>Completion Time</b> | <b>Literacy</b> | <b>Cost &amp; Copyright</b> | <b>Validated (yes or no)</b> | <b>Data Capture Burden Scoring, Interpretation, &amp; Extraction (e.g., EHR data or routinely collected data)</b><br>Categories:<br>Low, Moderate, High      | <b>How likely is the outcome to be relevant to Stakeholders?</b><br>Categories:<br>Low, Medium, High | <b>Summary of the Pragmatic Quality of the outcome measure</b><br>Categories:<br>Low, Moderate, High                                                    |
|-------------------------------------------------------------------------------------------------------------------------|---------------------------------------------------------------------------------------------------------|-------------------|------------------------|-----------------|-----------------------------|------------------------------|--------------------------------------------------------------------------------------------------------------------------------------------------------------|------------------------------------------------------------------------------------------------------|---------------------------------------------------------------------------------------------------------------------------------------------------------|
| Family Perceptions of Care Scale<br><br>Brazil et al (2018), UK                                                         | Quality of Care                                                                                         | 25                | NS                     | NS              | NS                          | Yes                          | High<br><br>○ high scoring burden, high burden interpret, not routinely collected data in EHR and would be hard to embed in EHR                              | Medium<br><br>○ many would feel satisfaction with NH care is important.                              | Low<br><br>○ requires proxy assessment, not routinely assessed in clinical practice, would be challenging to embed in the EHR                           |
| Life Satisfaction Scale (Assessed using the Lancashire Quality of Life Profile)<br><br>Sampson et al (2011), London, UK | Quality of Care                                                                                         | 1                 | 5 minutes              | NS              | NS                          | Yes                          | Moderate<br><br>○ easy to score and interpret but not routinely collected data, requires proxy assessment, at same time, might be able to embed into the EHR | High<br><br>○ Most would feel life satisfaction is important                                         | Low<br><br>○ requires proxy assessment, not routinely assessed in clinical practice, would be challenging to embed in the EHR                           |
| Patient Satisfaction Questionnaire (PSQ-18)<br><br>Overbeek et al (2018), the Netherlands                               | Quality of Care                                                                                         | 18                | 5 minutes              | NS              | Copyright but no cost       | Yes                          | Moderate<br><br>○ Requires moderate effort to score and interpret. May be challenging to embed and extract from the electronic record.                       | High<br><br>○ Most would feel satisfaction is important                                              | Moderate<br><br>○ moderate data burden, not routinely assessed in clinical practice, May be challenging to embed and extract from the electronic record |

| Name of Outcome Measure (First Author et al (year))              | ACP Outcome Domain<br>Categories:<br>Process, Action.<br>Quality of Care, or healthcare outcomes | # of Items                  | Completion Time | Literacy | Cost & Copyright | Validated (yes or no) | Data Capture Burden Scoring, Interpretation, & Extraction (e.g., EHR data or routinely collected data)<br>Categories:<br>Low, Moderate, High | How likely is the outcome to be relevant to Stakeholders?<br>Categories:<br>Low, Medium, High | Summary of the Pragmatic Quality of the outcome measure<br>Categories:<br>Low, Moderate, High                                                                                               |
|------------------------------------------------------------------|--------------------------------------------------------------------------------------------------|-----------------------------|-----------------|----------|------------------|-----------------------|----------------------------------------------------------------------------------------------------------------------------------------------|-----------------------------------------------------------------------------------------------|---------------------------------------------------------------------------------------------------------------------------------------------------------------------------------------------|
| Satisfaction scale<br><br>Whitlatch et al (2019), USA            | Quality of Care                                                                                  | 24 (caregiver)<br>21 (PLCI) | NS              | NS       |                  | No                    | Moderate<br><br>○ Requires moderate effort to score and interpret. May be challenging to embed and extract from the electronic record.       | High<br><br>○ most stakeholders feel satisfaction is important                                | Low<br><br>○ moderate time and effort required to ask patients and caregivers to complete, and to link responses to actual lived experience, challenging to embed in the electronic record. |
| Satisfaction with Decision Scale<br><br>Hanson et al (2011), USA | Quality of Care                                                                                  | 6                           | 5 minutes       | NS       | NS               | Yes                   | Moderate<br><br>○ requires moderate effort to score and interpret. May be challenging to embed and extract from the electronic record.       | High<br><br>○ most stakeholders are likely to believe the outcome is useful.                  | Low<br><br>○ moderate time and effort required to ask surrogates to complete, and to link responses to a specific clinical decision, challenging to embed in the electronic record.         |

| <b>Name of Outcome Measure (First Author et al (year))</b>                              | <b>ACP Outcome Domain</b><br>Categories:<br>Process, Action. Quality of Care, or healthcare outcomes | <b># of Items</b> | <b>Completion Time</b> | <b>Literacy</b> | <b>Cost &amp; Copyright</b> | <b>Validated (yes or no)</b> | <b>Data Capture Burden Scoring, Interpretation, &amp; Extraction (e.g., EHR data or routinely collected data)</b><br>Categories:<br>Low, Moderate, High                                         | <b>How likely is the outcome to be relevant to Stakeholders?</b><br>Categories:<br>Low, Medium, High | <b>Summary of the Pragmatic Quality of the outcome measure</b><br>Categories:<br>Low, Moderate, High                                             |
|-----------------------------------------------------------------------------------------|------------------------------------------------------------------------------------------------------|-------------------|------------------------|-----------------|-----------------------------|------------------------------|-------------------------------------------------------------------------------------------------------------------------------------------------------------------------------------------------|------------------------------------------------------------------------------------------------------|--------------------------------------------------------------------------------------------------------------------------------------------------|
| Sense of Competence questionnaire (SCQ) score<br><br>Tilburgs et al (2020), Netherlands | Quality of Care                                                                                      | 27                | NS                     | NS              | NS                          | Yes                          | High<br><br>○ requires a trained administrator, requires moderate effort to score and interpret, requires proxy to complete, May be challenging to embed and extract from the electronic record | Medium<br><br>○ some stakeholders might find the outcome useful.                                     | Low<br><br>○ moderate time and effort required to ask surrogates to complete, may be challenging to embed and extract from the electronic record |
| Clinical Global Impression of Change (CGIC)<br><br>Husebø et al (2019), USA             | Quality of Care                                                                                      | 1                 | NS                     | NS              | NS                          | Yes                          | Moderate<br><br>○ simple to score, simple to interpret, could potentially be embedded into the EHR                                                                                              | Medium<br><br>○ some would find treatment response important                                         | Moderate<br><br>○ simple to score, simple to interpret, could potentially be embedded into the EHR                                               |

| Name of Outcome Measure (First Author et al (year))                                                                           | ACP Outcome Domain<br>Categories:<br>Process, Action.<br>Quality of Care, or healthcare outcomes | # of Items | Completion Time | Literacy | Cost & Copyright      | Validated (yes or no) | Data Capture Burden Scoring, Interpretation, & Extraction (e.g., EHR data or routinely collected data)<br>Categories:<br>Low, Moderate, High                                                           | How likely is the outcome to be relevant to Stakeholders?<br>Categories:<br>Low, Medium, High | Summary of the Pragmatic Quality of the outcome measure<br>Categories:<br>Low, Moderate, High                                                    |
|-------------------------------------------------------------------------------------------------------------------------------|--------------------------------------------------------------------------------------------------|------------|-----------------|----------|-----------------------|-----------------------|--------------------------------------------------------------------------------------------------------------------------------------------------------------------------------------------------------|-----------------------------------------------------------------------------------------------|--------------------------------------------------------------------------------------------------------------------------------------------------|
| Emotional-Intimacy Disruptive Behavior Scale<br><br>Whitlatch et al (2019), USA                                               | Quality of Care                                                                                  | 8          | NS              | NS       | Copyright but no cost | Yes                   | Moderate<br><br>○ requires moderate effort to score and interpret. Requires proxy to complete, may be challenging to incorporate in routine practice and embed and extract from the electronic record. | Medium<br><br>○ some disruptive behavior important.                                           | Low<br><br>○ moderate time and effort required to ask surrogates to complete, may be challenging to embed and extract from the electronic record |
| Family Perception of Physician-Family Communication reported by relatives (FPPFC )<br><br>Van den Block et al (2020), Belgium | Quality of Care                                                                                  | 7          | NS              | NS       | NS                    | Yes                   | Moderate<br><br>○ requires moderate effort to score and interpret. Requires proxy to complete, may be challenging to incorporate in routine practice and embed and extract from the electronic record. | High<br><br>○ most would find doctor-patient communication important.                         | Low<br><br>○ moderate time and effort required to ask surrogates to complete, may be challenging to embed and extract from the electronic record |

| Name of Outcome Measure (First Author et al (year))          | ACP Outcome Domain<br>Categories:<br>Process, Action.<br>Quality of Care, or healthcare outcomes | # of Items | Completion Time | Literacy | Cost & Copyright      | Validated (yes or no) | Data Capture Burden Scoring, Interpretation, & Extraction (e.g., EHR data or routinely collected data)<br>Categories:<br>Low, Moderate, High                                                                                               | How likely is the outcome to be relevant to Stakeholders?<br>Categories:<br>Low, Medium, High | Summary of the Pragmatic Quality of the outcome measure<br>Categories:<br>Low, Moderate, High                                                    |
|--------------------------------------------------------------|--------------------------------------------------------------------------------------------------|------------|-----------------|----------|-----------------------|-----------------------|--------------------------------------------------------------------------------------------------------------------------------------------------------------------------------------------------------------------------------------------|-----------------------------------------------------------------------------------------------|--------------------------------------------------------------------------------------------------------------------------------------------------|
| <b>Process: 6 outcome measures</b>                           |                                                                                                  |            |                 |          |                       |                       |                                                                                                                                                                                                                                            |                                                                                               |                                                                                                                                                  |
| Expectation of Benefit Index<br><br>Hanson et al (2011), USA | Process                                                                                          | 11         | NS              | NS       |                       | No                    | Moderate<br><br>○ requires proxy to answer 11 questions about knowledge of TF in dementia, moderate effort to score and interpret. May be challenging to incorporate in routine practice and embed and extract from the electronic record. | Low<br><br>○ Most would not feel knowledge of TF is important.                                | Low<br><br>○ moderate time and effort required to ask surrogates to complete, may be challenging to embed and extract from the electronic record |
| Knowledge assessment<br><br>Hanson et al (2011), USA         | Process                                                                                          | 19         | NS              | NS       | No cost, No copyright | No                    | Moderate<br><br>○ requires Surrogates to answer 19 true / false items about dementia and feeding options, May be challenging to incorporate in routine practice and embed and extract from the electronic record.                          | Low<br><br>○ Most are not likely to find knowledge of TFs important.                          | Low<br><br>○ moderate time and effort required to ask surrogates to complete, may be challenging to embed and extract from the electronic record |



| <b>Name of Outcome Measure (First Author et al (year))</b>                                   | <b>ACP Outcome Domain</b><br>Categories:<br>Process, Action.<br>Quality of Care, or healthcare outcomes | <b># of Items</b> | <b>Completion Time</b> | <b>Literacy</b> | <b>Cost &amp; Copyright</b> | <b>Validated (yes or no)</b> | <b>Data Capture Burden Scoring, Interpretation, &amp; Extraction (e.g., EHR data or routinely collected data)</b><br>Categories:<br>Low, Moderate, High                    | <b>How likely is the outcome to be relevant to Stakeholders?</b><br>Categories:<br>Low, Medium, High | <b>Summary of the Pragmatic Quality of the outcome measure</b><br>Categories:<br>Low, Moderate, High                                             |
|----------------------------------------------------------------------------------------------|---------------------------------------------------------------------------------------------------------|-------------------|------------------------|-----------------|-----------------------------|------------------------------|----------------------------------------------------------------------------------------------------------------------------------------------------------------------------|------------------------------------------------------------------------------------------------------|--------------------------------------------------------------------------------------------------------------------------------------------------|
| Knowledge assessment<br><br>Loizeau et al (2019), Switzerland                                | Process                                                                                                 | 14                | NS                     | NS              | No cost, No copyright       | No                           | Moderate<br><br>○ requires moderate effort to score and interpret. May be challenging to incorporate in routine practice and embed and extract from the electronic record. | Low<br><br>○ Most are not likely to find knowledge about TFs and antibiotics important.              | Low<br><br>○ moderate time and effort required to ask surrogates to complete, may be challenging to embed and extract from the electronic record |
| Self-Efficacy in End-of-Life Care Survey (S-EOLC)<br><br>Van den Block et al (2020), Belgium | Process                                                                                                 | 23                | NS                     | NS              | NS                          | Yes                          | High<br><br>○ high burden interpret, not routinely collected data in EHR and would be hard to embed in EHR.                                                                | Low<br><br>○ Most are not likely to feel confidence in providing PC is important.                    | Low<br><br>○ high data capture burden, provider assessment, would be hard to integrate into EHR                                                  |
| End-of-Life Professional Caregiver Survey (EPCS)<br><br>Van den Block et al (2020), Belgium  | Process                                                                                                 | 28                | NS                     | NS              | Copyright but no cost       | Yes                          | High<br><br>○ high burden interpret, not routinely collected data in EHR and would be hard to embed in EHR.                                                                | Low<br><br>○ Most are not likely to feel PC educational needs is important.                          | Low<br><br>○ high data capture burden, proxy assessment, would be hard to integrate into EHR                                                     |

| <b>Name of Outcome Measure (First Author et al (year))</b>                 | <b>ACP Outcome Domain</b><br>Categories:<br>Process, Action.<br>Quality of Care, or healthcare outcomes | <b># of Items</b> | <b>Completion Time</b> | <b>Literacy</b> | <b>Cost &amp; Copyright</b> | <b>Validated (yes or no)</b> | <b>Data Capture Burden Scoring, Interpretation, &amp; Extraction (e.g., EHR data or routinely collected data)</b><br>Categories:<br>Low, Moderate, High | <b>How likely is the outcome to be relevant to Stakeholders?</b><br>Categories:<br>Low, Medium, High | <b>Summary of the Pragmatic Quality of the outcome measure</b><br>Categories:<br>Low, Moderate, High |
|----------------------------------------------------------------------------|---------------------------------------------------------------------------------------------------------|-------------------|------------------------|-----------------|-----------------------------|------------------------------|---------------------------------------------------------------------------------------------------------------------------------------------------------|------------------------------------------------------------------------------------------------------|------------------------------------------------------------------------------------------------------|
| Rotterdam MOVE2PC questionnaire<br><br>Van den Block et al (2020), Belgium | Process                                                                                                 | 63                | <30 minutes            | NS              | NS                          | Yes                          | High<br><br>○ high burden interpret, not routinely collected data in EHR and would be hard to embed in EHR.                                             | Low<br><br>○ Most are not likely to feel nurse's knowledge of PC is important.                       | Low<br><br>○ high data capture burden, nurse assessment, would be hard to integrate into EHR         |

\* Note. NS= Not Specified (meaning article/reference did not specify), greyed out= not applicable, EHR=electronic health record, PLCI=Person living with cognitive impairment, CPR=Cardiopulmonary resuscitation,, MV=mechanical ventilation, TF= Tube Feeding, FT=Feeding Tube, PC=Palliative Care
